# Supplementary material for: The Performance of Time-Preference and Risk-Preference Measures in Surveys
Source: Atypon-hosted journal article supplement (doi:10.1287/mnsc.2020.3939), 2021-03-11
Supplement: mnsc.2020.3939.sm1.pdf [file mnsc.2020.3939.sm1.pdf]

# Appendix A Background Information (For Online Publication)

## A.1 Original Questions For Outcomes

| Surveys  | Authors                       | Variables                                                                                                       | Papers                                                                                                                  |
|----------|-------------------------------|-----------------------------------------------------------------------------------------------------------------|-------------------------------------------------------------------------------------------------------------------------|
| 2        | Kimball et al. (2007)         | Live Longer 85                                                                                                  | Measuring time preference and the elasticity of intertemporal with web surveys                                          |
| 5        | Lusardi and Mitchell (2007)   | Health                                                                                                          | Financial Literacy and retirement Planning: new evidence from the Rand American Life Panel                              |
| 10       | Dominitz et al. (2007)        | BetaDelta, Delta                                                                                                | Future Beneficiary Expectations of the Returns to Delayed Social Security Benefit Claiming and Choice Behavior          |
| 11       | Dominitz et al. (2008)        | BetaDelta                                                                                                       | How Do Mutual Fund Fees Affect Investor Choices ? Evidence from Survey Experiments                                      |
| 14       | Binswanger and Schunk (2012)  | BetaDelta                                                                                                       | What is an adequate standard of living during retirement?                                                               |
| 33       | Binswanger and Carman (2012)  | BetaDelta, Delta, Smoking                                                                                       | How real people make long-term decisions: The case of retirement preparation                                            |
| 57       | Chakrabarti et al. (2013)     | Any Stock, Pay Off Debt                                                                                         | Household Debt and Saving during the 2007 Recession                                                                     |
| 133      | Winter and Wuppermann (2014)  | Alcohol, Moderate Exercise Time, Fruit Vege, Cereal Fiber, Go to Doctor Routinely, Low Dose of Aspirin, Smoking | Do you they what's at risk? Health risk perception among the obese                                                      |
| 189      | Burke and Hung (2016)         | BetaDelta, Delta                                                                                                | Trust and Financial Advice                                                                                              |
| 193      | Brown et al. (2012)           | Health                                                                                                          | Long-Term Care Insurance Demand Limited By Beliefs About Needs, Concerns About Insurers, And Care Available From Family |
| 212      | Barcellos and Carvalho (2012) | Beta, Delta                                                                                                     | Self-control awareness and intertemporal choice behavior: evidence from a randomized experiment                         |
| 263, 235 | Carvalho et al. (2016a)       | Beta, Delta, Pay Bill Full, Paycheck to Paycheck                                                                | Poverty and economic decision-making: evidence from changes in financial resources at payday                            |
| 284      | Lusardi and Mitchell (2014)   | Payday loan                                                                                                     | The economic importance of financial literacy: theory and evidence                                                      |
| 348      | Barcellos et al. (2014)       | Medical Insurance                                                                                               | Preparedness of Americans for the Affordable Care Act                                                                   |
| 399      | Goda et al. (2019)            | BetaDelta, Delta, Bankruptcy, Retirement Savings Amount                                                         | Predicting retirement savings using survey measures of exponential-growth bias and present-bias                         |

- Health
 

Would you say your health is excellent, very good, good, fair or poor?

  - Excellent
  - Very good
  - Good
  - Fair
  - Poor
  
- Any Stock
 

Do you have any shares of stock or stock mutual funds? Please include stocks that you hold directly and any stocks that you hold in any employer pension accounts or in other retirement accounts such as IRA's

  - Yes
  - No
  
- Live Longer 85
 

What is the percent chance that you will live to be 85 or more?

  - Range: 0-100
  
- Bankruptcy
 

You declared bankruptcy

  - Yes
  - No
  
- Pay Off Debt
 

Last month did you pay off all your credit card debt or was there an unpaid debt that you carried over to this month?

  - Paid off all
  - Carried over unpaid debt
  
- Checking Saving Amount
 

Checking or savings accounts or money market funds: Do not include any assets you reported earlier, for example under retirement accounts
  
- Retire Savings Account
 

Do you have any employer-provided retirement accounts? These include any Defined Benefit or Defined Contribution plan ( for instance 401(*k*)/403(*b*), profit-sharing, stock purchase, cash balance, or combination plans).

- Yes
  - No
  - Don't know
- Pay Bill Full
 

How do you typically pay on your credit card bills?

    - I pay off my balance in full each month
    - I pay less than the full balance, but more than the minimum payment
    - I make the minimum monthly payment
    - I'm typically behind on my payments
    - I don't know
- Paycheck to Paycheck
 

I live from paycheck to paycheck

    - Strongly agree
    - Agree
    - Neutral
    - Disagree
    - Strongly disagree
- Retire Saving Amount
 

Think about your savings in personal retirement accounts from all different sources, including: Individual Retirement Accounts (IRAs), Keogh accounts, 401(*k*)s, 403(*b*)s, etc. About how much total personal retirement savings do you have from all sources?
- Alcohol
 

How many servings of alcohol do you have on a typical day? (One serving is a can of beer, a glass of wine or a shot of liquor.)

    - None
    - 1
    - 2
    - 3 or more
- Moderate Exercise Time
 

How many times per week do you do some sort of moderate activity (like walking or raking the leaves ) for at least 30 minutes?

    - Not at all

- 1
- 2
- 3
- 4
- 5
- 6
- 7 or more

- Fruit Vege

On average, how many servings of fruits and vegetables do you eat in a day?

- 0
- 1
- 2
- 3
- 4
- 5
- 6 or more

- Cereal Fiber

How many servings of cereal fiber or whole grain (wheat bread, whole grain pasta, brown rice, oatmeal, whole grain breakfast cereal, bran or popcorn) do you eat in a typical day? A serving is one slice of bread, 1 ounce of breakfast cereal or a cup of cooked cereal, pasta or rice.

- 0
- 1
- 2
- 3
- 4
- 5
- 6 or more

- Go to Doctor Routinely

Do you go to a doctor to have a routine examination at least twice a year?

- No
- Yes

- Low Dose of Aspirin  
Do you take lowdose aspirin every day?
  - Yes
  - No
  
- Smoking  
Do you smoke cigarettes?
  - Yes
  - Yes, but not much
  - Sometimes
  - No, never
  
- Payday Loan  
Taken out a short term "payday" loan?
  - Never
  - 1 time
  - 2 times
  - 3 times
  - 4 or more times
  - Don't know
  - Prefer not to say
  
- Medical Insurance  
Are you currently covered by any kind of health insurance or some other kind of healthcare plan?
  - Yes
  - No

## A.2 Summary Statistics

Table A.2: Demographic Controls and Outcomes

|                        | count | mean      | sd        | notes                                                                     |
|------------------------|-------|-----------|-----------|---------------------------------------------------------------------------|
| Family Income          | 7054  | 58,108.53 | 42,930.89 | Numerical                                                                 |
| Calcage                | 7054  | 47.01     | 15.45     | Numerical                                                                 |
| <u>Gender</u>          |       |           |           | Categorical                                                               |
| male                   | 7054  | 0.42      | 0.49      |                                                                           |
| female                 | 7054  | 0.58      | 0.49      |                                                                           |
| <u>Education</u>       |       |           |           | Categorical                                                               |
| HS or Less             | 7054  | 0.24      | 0.43      |                                                                           |
| Some College           | 7054  | 0.26      | 0.44      |                                                                           |
| Assoc Degree           | 7054  | 0.13      | 0.33      |                                                                           |
| BA/BS Degree           | 7054  | 0.23      | 0.42      |                                                                           |
| Post BA/BS             | 7054  | 0.15      | 0.36      |                                                                           |
| <u>Race</u>            |       |           |           | Categorical                                                               |
| Asian                  | 7054  | 0.02      | 0.15      |                                                                           |
| Black/African American | 7054  | 0.12      | 0.32      |                                                                           |
| American Indian        | 7054  | 0.01      | 0.11      |                                                                           |
| Other                  | 7054  | 0.09      | 0.28      |                                                                           |
| White/Caucasian        | 7054  | 0.76      | 0.43      |                                                                           |
| <u>FICO</u>            |       |           |           | Categorical                                                               |
| 300                    | 7054  | 0.06      | 0.24      |                                                                           |
| 625                    | 7054  | 0.06      | 0.23      |                                                                           |
| 675                    | 7054  | 0.05      | 0.22      |                                                                           |
| 725                    | 7054  | 0.11      | 0.31      |                                                                           |
| 775                    | 7054  | 0.09      | 0.29      |                                                                           |
| 825                    | 7054  | 0.06      | 0.24      |                                                                           |
| Missing                | 7054  | 0.57      | 0.49      |                                                                           |
| Health                 | 5862  | 2.48      | 0.91      | 4=Excellent, 3=Very good, 2=Good, 1=Fair, 0=Poor                          |
| Any Stock              | 4555  | 0.24      | 0.36      | Percentage                                                                |
| Live Longer 85         | 5534  | 45.26     | 25.34     | 0=absolutely no chance, 100=absolutely certain                            |
| Bankruptcy             | 4091  | 0.07      | 0.25      | Binary, 0=no bankruptcy, 1=bankruptcy                                     |
| Pay Off Debt           | 3625  | 0.29      | 0.46      | Binary, 0=Carried unpaid debt, 1=paid off all debt                        |
| Checking Saving Amount | 3297  | 7,567.45  | 11,795.11 | Numerical                                                                 |
| Has Retirement Savings | 3604  | 0.49      | 0.50      | Binary, 0=No, 1=Yes                                                       |
| Pay Bill Full          | 1389  | 2.44      | 0.68      | 0=Behind payment, 1=Minimum payment, 2=Less than full, 3=Pay balance full |

Notes: Family Income is Winsorized at top 5%. Retirement Savings and Checking Saving Amount are winsorized for 10

Table A.2: Demographic Controls and Outcomes (Continued)

|                        | count | mean      | sd        | notes                                                                                                            |
|------------------------|-------|-----------|-----------|------------------------------------------------------------------------------------------------------------------|
| Paycheck to Paycheck   | 1952  | 3.05      | 1.26      | 4=Strongly disagree, 3=Disagree, 2=Neutral, 1=Agree, 0=Strongly agree                                            |
| Retirement Savings     | 2605  | 88,242.80 | 133512.86 | Numerical                                                                                                        |
| Alcohol                | 2897  | 0.47      | 0.82      | 0=None, 1=1 serving, 2=2 servings, 3=3 or more servings                                                          |
| Moderate Exercise Time | 2897  | 4.92      | 2.05      | Times per week: 1=Not at all, 2=1 time, 3=2 times, 4=3 times, 5=4 times, 6=5 times, 7=6 times, 8=7 times or more |
| Fruit Vege             | 2895  | 3.71      | 1.44      | Servings per day: 1=0, 2=1, 3=2, 4=3, 5=4, 6=5, 7=6 servings or more                                             |
| Cereal Fiber           | 2895  | 3.39      | 1.35      | Servings per day: 1=0, 2=1, 3=2, 4=3, 5=4, 6=5, 7=6 servings or more                                             |
| Go to Doctor Routinely | 2897  | 0.49      | 0.50      | Binary: 0=no, 1=yes                                                                                              |
| Low Dose of Aspirin    | 2897  | 0.25      | 0.43      | Binary: 0=no, 1=yes                                                                                              |
| Smoking                | 4383  | 0.46      | 0.97      | Numerical: 0=no, never, 1=sometimes, 2=Yes, but not much, 3=Yes                                                  |
| Payday Loan            | 1879  | 0.21      | 0.76      | 0=never, 1=once, 2=twice, 3=3 times, 4=4 or more times                                                           |
| Medical Insurance      | 3620  | 0.80      | 0.40      | Binary, 0=No, 1=Yes                                                                                              |
| Observations           | 7054  |           |           |                                                                                                                  |

Notes: Family Income is Winsorized at top 5%. Retirement Savings and Checking Saving Amount are winsorized for 10

## Appendix B Temporal Stability

### B.1 Related Literature

Stability has been defined in various ways. It is often measured by test-retest correlation (Wolbert and Riedl, 2013) and is also referred to as time invariance (Halevy, 2015). Chuang and Schechter (2015) comprehensively summarize the literature on time-preference and risk-preference stability, reporting the results of 25 papers. Amongst studies that have at least 100 subjects, they find test-retest correlations in the ranges of 0.09–0.68 for time preference (Kirby et al., 2002; Krupka and Stephens, 2013; Li et al., 2013; Dean and Sautmann, 2014; Meier and Sprenger, 2015) and 0.13–0.55 for risk preference respectively (Levin et al., 2007; Guiso et al., 2013; Kimball et al., 2008; Sahm, 2012; Beauchamp et al., 2017; Smidts, 1997; Schoemaker and Hershey, 1992). This considerable variation in test-retest correlation may be due to the variation in methodology and sample. For instance, Dean and Sautmann (2014) use a multiple-price list with peri-urban Malians, Wolbert and Riedl (2013) use a money-earlier-or-later (MEL) task with varying horizons on Dutch university students, and Meier and Sprenger (2015) use a multiple-price list with low-income Americans. However, since there is no study (to our knowledge) that uses repeated measures across more than one method, it is unclear what fraction of the variation in stability can be attributed to variation in methodology versus variation in sample. Our paper is the first to have repeated measures using more than one method on the same sample.

There is some research on the correlates of instability. Krupka and Stephens (2013) find that changes in the strength of the macroeconomy and changes in household income are correlated with changes in a person’s elicited time preference. Carvalho et al. (2016b) find that present bias, as measured by a MEL task, is higher before payday than after payday. Meier and Sprenger (2015) test job status, demographic variables, income change, family composition change and future liquidity change and find that none correlate with time-preference stability.

There is an extensive literature on risk preference stability. Following Zeisberger et al. (2012), stability research can be grouped into papers on stability across domains, over institutions, and over time. Whether risk preferences are stable over domains is controversial. Dohmen et al. (2011) explore risk attitudes for five domains in the German Socio-Economic Panel. They find high correlation among the domain-specific risk attitudes. Reynaud and Couture (2012) and Crosetto and Filippin (2016), using the Domain-Specific Risk-Taking instrument (Blais and Weber, 2006), corroborate their results. However, several empirical studies with field data reject the hypothesis that risk preferences are stable across contexts. Dawling et al. (2011) use insurance data to show that risk aversion is context-dependent between home and auto deductible choice. Einav et al. (2012) find instability in risk attitudes among different insurance domains.

Research that compares within-person measures of risk preference across different elicitation methods finds high instability. Isaac and James (2000) are the first to look at within-subject risk preference stability across elicitation methods. Reynaud and Couture (2012) find instability using the Holt and Laury (2002) (HL) and the Eckel and Grossman (2008) (EG)

elicitation methods. Deck et al. (2013) add “Deal or not Deal” method (Deck et al., 2008), a Balloon Analogue Risk Task (BART) (Lejuez et al., 2002), and DOSPERT. Lönnqvist et al. (2015) compares DOSPERT with HL. Both papers observe large instability. Other papers have found similar results (Berg et al., 2005; Dave et al., 2010; Deck et al., 2010; Charness et al., 2013; Mata et al., 2018).

The literature on risk-preference stability over time is less conclusive (Zeisberger et al., 2012; Baucells and Villasís, 2010; Andersen et al., 2006; Wolbert and Riedl, 2013; Smidts, 1997; Wehrung et al., 1984; Harrison et al., 2005; Schildberg-Horisch, 2018). According to Chuang and Schechter (2015) test-retest correlations of risk preference range from -0.38 to 0.68. As with the literature on time preference stability, this variation may be caused by variation in elicitation methods and variation in samples, across papers. For instance, Zeisberger et al. (2012) elicit risk preferences using certainty equivalents stated in both gain and losses with undergraduate students from Germany, Andersen et al. (2006) use a multiple-price list (MPL) with Danish adults, and Wolbert and Riedl (2013) elicit certainty equivalents on a multiple-choice task with Dutch students. Variation in both methodology and sample can contribute to the considerable variation in measured stability across papers. Our data can partially address this by keeping the sample fixed, and looking at within-method stability versus across-method stability.

## B.2 Correlations

We begin by measuring the pairwise Spearman (rank) correlations between all the time preference measures. Table B.1 displays the results. Keep in mind that each correlation is computed using a different sample. The correlations show great variation, ranging from -0.18 to 0.51.<sup>15</sup> Interestingly, the correlation between receive-format titration measures and other receive-format titration measures tend to have the highest correlations. The average is 0.31. The pay-format measures correlate modestly with each other with an average of 0.21 but quite poorly with the receive-format measures with an average of 0.02. The single real-effort measure (with real stakes) does not correlate with any of the other measures. The CTB measures do not correlate well with each other with  $\rho = 0.03$ . Based on average and median correlations, titration receive-format has the highest average correlations at 0.17, followed by the titration pay-format, MPL pay-format, and CTB all at an average correlation of 0.06, and real effort at 0.05. Cronbach’s  $\alpha$ , which is a measure of the average correlation across all the measures, is 0.42.

Table B.2 shows pairwise Spearman correlation between every pair of risk measures, with correlations ranging from -0.11 to 0.56. Based on elicitation methods and contexts, we group surveys into seven categories: titration job, titration insurance, titration inheritance, Eckel & Grossman, titration ball, titration retirement savings, and multiple price list (MPL). Titration inheritance has the highest average correlation of 0.20 amongst all categories. The correlation between the titration inheritance surveys is 0.41 and 0.53, a respectable test-retest

---

<sup>15</sup>The correlation between Survey 125 and Survey 276 actually has a correlation of -1 but the sample is only 2 subjects.

Table B.1: Spearman Correlations of  $\beta \times \delta$

|                                | Survey11<br>Titration Pay | Survey14<br>MPL Pay    | Survey248<br>MPL Pay   | Survey10<br>Titration Receive | Survey276<br>Titration Receive | Survey125<br>Titration Receive | Survey126<br>Titration Receive | Survey189<br>Titration Receive | Survey399<br>Titration Receive | Survey263<br>Real Effort | Survey212<br>CTB      | Survey263<br>CTB |
|--------------------------------|---------------------------|------------------------|------------------------|-------------------------------|--------------------------------|--------------------------------|--------------------------------|--------------------------------|--------------------------------|--------------------------|-----------------------|------------------|
| Survey11<br>Titration Pay      | 1.00                      |                        |                        |                               |                                |                                |                                |                                |                                |                          |                       |                  |
| Survey14<br>MPL Pay            | 1088                      | 1.00                   |                        |                               |                                |                                |                                |                                |                                |                          |                       |                  |
| Survey248<br>MPL Pay           | (0.00)<br>1088            | 1266                   | 1.00                   |                               |                                |                                |                                |                                |                                |                          |                       |                  |
| Survey10<br>Titration Receive  | 0.05<br>(0.10)<br>1085    | 0.01<br>(0.65)<br>1095 | 0.05<br>(0.09)<br>1118 | 1.00                          |                                |                                |                                |                                |                                |                          |                       |                  |
| Survey276<br>Titration Receive | -0.10<br>(0.62)<br>26     | -0.10<br>(0.63)<br>27  | 0.07<br>(0.01)<br>1542 | 0.48<br>(0.01)<br>26          | 1.00                           |                                |                                |                                |                                |                          |                       |                  |
| Survey125<br>Titration Receive | 0.27<br>(0.07)<br>47      | 0.12<br>(0.40)<br>52   | -0.18<br>(0.09)<br>94  | 0.33<br>(0.02)<br>50          | -1.00                          | 1.00                           |                                |                                |                                |                          |                       |                  |
| Survey126<br>Titration Receive | 0.08<br>(0.64)<br>35      | -0.15<br>(0.36)<br>39  | 0.01<br>(0.92)<br>74   | 0.45<br>(0.01)<br>35          | 0.34<br>(0.51)<br>6            | 1.00                           | 1.00                           |                                |                                |                          |                       |                  |
| Survey189<br>Titration Receive | 0.05<br>(0.17)<br>884     | 0.00<br>(0.91)<br>1005 | 0.06<br>(0.00)<br>2580 | 0.36<br>(0.00)<br>916         | 0.39<br>(0.00)<br>459          | 0.35<br>(0.00)<br>97           | 0.14<br>(0.24)<br>76           | 1.00                           |                                |                          |                       |                  |
| Survey399<br>Titration Receive | 0.01<br>(0.85)<br>378     | -0.02<br>(0.71)<br>426 | 0.16<br>(0.00)<br>1237 | 0.35<br>(0.00)<br>387         | 0.33<br>(0.00)<br>607          | 0.25<br>(0.11)<br>43           | 0.51<br>(0.02)<br>22           | 0.43<br>(0.00)<br>930          | 1.00                           |                          |                       |                  |
| Survey263<br>Real Effort       | -0.11<br>(0.22)<br>130    | -0.03<br>(0.75)<br>149 | 0.01<br>(0.71)<br>705  | 0.07<br>(0.41)<br>133         | -0.00<br>(0.95)<br>473         | 0.48<br>(0.07)<br>15           | 0.19<br>(0.46)<br>18           | -0.06<br>(0.22)<br>447         | -0.10<br>(0.10)<br>303         | 1.00                     |                       |                  |
| Survey212<br>CTB               | 0.05<br>(0.13)<br>800     | 0.04<br>(0.26)<br>907  | 0.05<br>(0.01)<br>2603 | -0.03<br>(0.45)<br>829        | 0.00<br>(0.91)<br>712          | -0.11<br>(0.32)<br>89          | 0.19<br>(0.12)<br>66           | -0.03<br>(0.11)<br>2351        | -0.01<br>(0.69)<br>938         | 0.02<br>(0.66)<br>456    | 1.00                  | 3091             |
| Survey263<br>CTB               | 0.01<br>(0.93)<br>125     | 0.11<br>(0.18)<br>145  | 0.10<br>(0.01)<br>638  | 0.27<br>(0.00)<br>130         | 0.05<br>(0.32)<br>397          | 0.06<br>(0.83)<br>18           | 0.27<br>(0.36)<br>14           | 0.03<br>(0.59)<br>412          | 0.07<br>(0.27)<br>272          | 0.03<br>(0.34)<br>749    | 0.03<br>(0.56)<br>430 | 1.00<br>837      |
| Average:                       | 0.06                      | 0.04                   | 0.06                   | 0.22                          | 0.04                           | 0.14                           | 0.28                           | 0.16                           | 0.18                           | 0.05                     | 0.02                  | 0.09             |
| Median:                        | 0.05                      | 0.01                   | 0.06                   | 0.27                          | 0.05                           | 0.25                           | 0.19                           | 0.06                           | 0.16                           | 0.01                     | 0.02                  | 0.06             |
| Cronbach's Alpha:              | 0.42                      |                        |                        |                               |                                |                                |                                |                                |                                |                          |                       |                  |

Note: Pairwise correlation coefficients between Beta×Delta. Sample sizes reflect the intersection between the two survey samples. P-values in parentheses. Cronbach's Alpha is between all surveys.

Table B.2: Spearman Correlations of Risk Aversion

|                                       | Survey2_1<br>Titration Job | Survey2_2<br>Titration Job | Survey167<br>Titration Job | Survey197_h<br>Titration Job | Survey197_a<br>Titration Job | Survey197_i<br>Titration Instance | Survey50<br>Titration Inheritance | Survey189<br>Titration Inheritance | Survey186<br>Titration Inheritance | Survey399<br>Ekel & Gossman | Survey243<br>Titration Ball | Survey338<br>Titration Ball | Survey339<br>Titration Ball | Survey118<br>Titration Retire Savings | Survey210<br>MPL |
|---------------------------------------|----------------------------|----------------------------|----------------------------|------------------------------|------------------------------|-----------------------------------|-----------------------------------|------------------------------------|------------------------------------|-----------------------------|-----------------------------|-----------------------------|-----------------------------|---------------------------------------|------------------|
| Survey2_1<br>Titration Job            | 1.00                       |                            |                            |                              |                              |                                   |                                   |                                    |                                    |                             |                             |                             |                             |                                       |                  |
| Survey2_2<br>Titration Job            | 0.38<br>(0.00)             | 1.00                       |                            |                              |                              |                                   |                                   |                                    |                                    |                             |                             |                             |                             |                                       |                  |
| Survey167<br>Titration Job            | 0.33<br>(0.04)             | 0.12<br>(0.45)             | 1.00                       |                              |                              |                                   |                                   |                                    |                                    |                             |                             |                             |                             |                                       |                  |
| Survey197_h<br>Titration Job          | 0.39<br>(0.00)             | 0.21<br>(0.00)             | 0.38<br>(0.00)             | 1.00                         |                              |                                   |                                   |                                    |                                    |                             |                             |                             |                             |                                       |                  |
| Survey197_a<br>Titration Job          | 0.31<br>(0.00)             | 0.08<br>(0.17)             | 0.27<br>(0.00)             | 0.41<br>(0.00)               | 1.00                         |                                   |                                   |                                    |                                    |                             |                             |                             |                             |                                       |                  |
| Survey197_i<br>Titration Instance     | 0.10<br>(0.09)             | 0.02<br>(0.77)             | 0.03<br>(0.47)             | -0.02<br>(0.50)              | 0.01<br>(0.58)               | 1.00                              |                                   |                                    |                                    |                             |                             |                             |                             |                                       |                  |
| Survey50<br>Titration Inheritance     | 0.20<br>(0.00)             | 0.07<br>(0.19)             | 0.24<br>(0.00)             | 0.27<br>(0.00)               | 0.25<br>(0.00)               | -0.02<br>(0.51)                   | 1.00                              |                                    |                                    |                             |                             |                             |                             |                                       |                  |
| Survey189<br>Titration Inheritance    | 0.34<br>(0.00)             | 0.20<br>(0.00)             | 0.26<br>(0.00)             | 0.22<br>(0.00)               | 0.22<br>(0.00)               | -0.04<br>(0.08)                   | 1.00                              | 1.00                               |                                    |                             |                             |                             |                             |                                       |                  |
| Survey186<br>Titration Inheritance    | 0.21<br>(0.48)             | 0.13<br>(0.66)             | 0.02<br>(0.03)             | 0.32<br>(0.00)               | 0.21<br>(0.00)               | -0.14<br>(0.06)                   | 0.53<br>(0.00)                    | 1.00                               | 1.00                               |                             |                             |                             |                             |                                       |                  |
| Ekel & Gossman                        | 0.08<br>(0.38)             | 0.01<br>(0.91)             | 0.09<br>(0.12)             | 0.08<br>(0.04)               | 0.11<br>(0.01)               | 0.01<br>(0.81)                    | 0.12<br>(0.00)                    | 0.07<br>(0.37)                     | 1.00                               | 1.00                        |                             |                             |                             |                                       |                  |
| Survey243<br>Titration Ball           | 0.09<br>(0.37)             | -0.11<br>(0.46)            | -0.03<br>(0.74)            | -0.02<br>(0.81)              | -0.01<br>(0.89)              | 0.01<br>(0.39)                    | 0.08<br>(0.08)                    | 0.36<br>(0.00)                     | 0.27<br>(0.00)                     | 1.00                        |                             |                             |                             |                                       |                  |
| Survey338<br>Titration Ball           | -0.04<br>(0.54)            | 0.06<br>(0.34)             | 0.07<br>(0.13)             | 0.04<br>(0.23)               | 0.08<br>(0.00)               | -0.04<br>(0.13)                   | 0.12<br>(0.00)                    | 0.08<br>(0.21)                     | 0.19<br>(0.06)                     | 0.20<br>(0.00)              | 1.00                        |                             |                             |                                       |                  |
| Survey339<br>Titration Ball           | 0<br>(0.22)                | 0<br>(0.51)                | -0.34<br>(0.04)            | -0.05<br>(0.58)              | 0.14<br>(0.63)               | 0.13<br>(0.64)                    | 0.32<br>(0.14)                    | 0.37<br>(0.03)                     | 0.11<br>(0.39)                     | -0.07<br>(0.63)             | 1.00                        |                             |                             |                                       |                  |
| Survey118<br>Titration Retire Savings | 0.11<br>(0.05)             | -0.01<br>(0.86)            | 0.14<br>(0.00)             | 0.13<br>(0.00)               | 0.18<br>(0.00)               | 0.05<br>(0.06)                    | 0.19<br>(0.00)                    | 0.14<br>(0.00)                     | 0.08<br>(0.03)                     | 0.10<br>(0.04)              | 0.52<br>(0.00)              | 1.00                        |                             |                                       |                  |
| Survey210<br>MPL                      | 0.21<br>(0.00)             | 0.19<br>(0.00)             | 0.19<br>(0.00)             | 0.20<br>(0.00)               | 0.17<br>(0.00)               | -0.05<br>(0.06)                   | 0.26<br>(0.00)                    | 0.28<br>(0.00)                     | 0.19<br>(0.00)                     | 0.12<br>(0.00)              | 0.50<br>(0.00)              | 0.09<br>(0.00)              | 1.00                        |                                       |                  |
| Average                               | 0.32                       | 0.30                       | 0.48                       | 0.55                         | 0.64                         | 0.56                              | 0.58                              | 0.52                               | 0.52                               | 0.58                        | 0.52                        | 0.52                        | 0.52                        | 0.52                                  | 0.52             |
| Median                                | 0.20                       | 0.08                       | 0.14                       | 0.20                         | 0.17                         | 0.01                              | 0.19                              | 0.22                               | 0.11                               | 0.08                        | 0.14                        | 0.11                        | 0.11                        | 0.11                                  | 0.19             |
| Cronbach's Alpha                      | 0.20                       | 0.08                       | 0.14                       | 0.20                         | 0.17                         | 0.01                              | 0.19                              | 0.22                               | 0.11                               | 0.08                        | 0.14                        | 0.11                        | 0.11                        | 0.11                                  | 0.19             |

Note: P-values in parentheses. Sample sizes reflect the intersection between the two survey samples. Cronbach's Alpha is between all surveys except survey186, survey338, and survey339.

correlation.

In Table B.1 and Table B.2, pairwise correlations have different samples and sample sizes. Table B.3 uses the time overlap sample in which all subjects responded to all six of the listed surveys. The results are consistent with those found in Table B.1. The average pay-pay and receive-receive correlations are 0.19 and 0.38 respectively while the average pay-receive correlation is only 0.04. Table B.4 uses the risk overlap sample in which all subjects responded to all nine of the listed surveys. As a whole, both the job titration and inheritance titration methods do well with average correlations of 0.20 and 0.21. Finally, Table B.5 displays the correlations between the time-preference measures and risk-preference measures.

Table B.3: Correlation of  $\beta \times \delta$  for Overlap Sample

|                                | Survey11        | Survey14        | Survey248       | Survey10       | Survey189      | Survey399 |
|--------------------------------|-----------------|-----------------|-----------------|----------------|----------------|-----------|
| Survey11<br>Titration Pay      | 1.00            |                 |                 |                |                |           |
| Survey14<br>MPL Pay            | 0.17<br>(0.00)  | 1.00            |                 |                |                |           |
| Survey248<br>MPL Pay           | 0.09<br>(0.08)  | 0.27<br>(0.00)  | 1.00            |                |                |           |
| Survey10<br>Titration Receive  | 0.09<br>(0.08)  | 0.04<br>(0.41)  | -0.01<br>(0.92) | 1.00           |                |           |
| Survey189<br>Titration Receive | -0.01<br>(0.78) | 0.05<br>(0.38)  | 0.02<br>(0.75)  | 0.32<br>(0.00) | 1.00           |           |
| Survey399<br>Titration Receive | 0.00<br>(1.00)  | -0.00<br>(0.95) | 0.11<br>(0.03)  | 0.33<br>(0.00) | 0.43<br>(0.00) | 1.00      |
| Average:                       | 0.07            | 0.11            | 0.10            | 0.15           | 0.16           | 0.17      |
| Median:                        | 0.09            | 0.05            | 0.09            | 0.09           | 0.05           | 0.11      |
| Cronbach's Alpha:              | 0.47            |                 |                 |                |                |           |

Note: Overlap sample includes all subjects who responded to all six of the listed surveys.  $p$ -values in parentheses. Cronbach's  $\alpha$  is between all surveys in the table.

Performance is respectable amongst the most stable methodologies, receive-format titration and inheritance titration. Compared to the psychometric literature, a test-retest correlation of 0.3–0.4 is considered to be not terribly good. For example, the Moray House Test, a cognitive ability test used in Scotland, had an impressive test-retest of 0.73 from age 11 to age 80 (Deary et al., 2004)! Personality traits have a test-retest correlation of 0.31-0.74,

Table B.4: Correlation of Risk Aversion for Overlap Sample

|                                       | Survey167      | Survey197_h    | Survey197_a    | Survey197_i     | Survey50       | Survey189      | Survey243      | Survey118      | Survey210 |
|---------------------------------------|----------------|----------------|----------------|-----------------|----------------|----------------|----------------|----------------|-----------|
| Survey167<br>Titration Job            | 1.00           |                |                |                 |                |                |                |                |           |
| Survey197_h<br>Titration Job          | 0.34<br>(0.00) | 1.00           |                |                 |                |                |                |                |           |
| Survey197_a<br>Titration Job          | 0.29<br>(0.00) | 0.40<br>(0.00) | 1.00           |                 |                |                |                |                |           |
| Survey197_i<br>Titration Insurance    | 0.05<br>(0.26) | 0.05<br>(0.25) | 0.09<br>(0.06) | 1.00            |                |                |                |                |           |
| Survey50<br>Titration Inheritance     | 0.21<br>(0.00) | 0.25<br>(0.00) | 0.26<br>(0.00) | -0.02<br>(0.68) | 1.00           |                |                |                |           |
| Survey189<br>Titration Inheritance    | 0.23<br>(0.00) | 0.27<br>(0.00) | 0.22<br>(0.00) | -0.09<br>(0.06) | 0.43<br>(0.00) | 1.00           |                |                |           |
| Survey243<br>Titration Ball           | 0.09<br>(0.05) | 0.06<br>(0.22) | 0.09<br>(0.06) | -0.04<br>(0.38) | 0.21<br>(0.00) | 0.16<br>(0.00) | 1.00           |                |           |
| Survey118<br>Titration Retire Savings | 0.13<br>(0.01) | 0.06<br>(0.22) | 0.12<br>(0.01) | 0.08<br>(0.10)  | 0.19<br>(0.00) | 0.07<br>(0.11) | 0.14<br>(0.00) | 1.00           |           |
| Survey210<br>MPL                      | 0.18<br>(0.00) | 0.25<br>(0.00) | 0.15<br>(0.00) | -0.05<br>(0.29) | 0.22<br>(0.00) | 0.29<br>(0.00) | 0.20<br>(0.00) | 0.02<br>(0.62) | 1.00      |
| Average:                              | 0.19           | 0.21           | 0.20           | 0.01            | 0.22           | 0.20           | 0.11           | 0.10           | 0.16      |
| Median:                               | 0.20           | 0.25           | 0.18           | 0.02            | 0.21           | 0.23           | 0.12           | 0.10           | 0.19      |
| Cronbach's Alpha:                     | 0.59           |                |                |                 |                |                |                |                |           |

Note: Overlap sample includes all subjects responded to all nine of the listed surveys.  $p$ -values in parentheses. Cronbach's  $\alpha$  is between all surveys in the table.

Table B.5: Intercorrelations of overlap sample between TP and RP

|             | BetaDelta_11    | BetaDelta_14    | BetaDelta_248   | BetaDelta_10    | BetaDelta_189   | Average | Median |
|-------------|-----------------|-----------------|-----------------|-----------------|-----------------|---------|--------|
| RiskA_197_H | 0.03<br>(0.57)  | -0.04<br>(0.40) | 0.01<br>(0.80)  | -0.14<br>(0.00) | -0.21<br>(0.00) | -0.07   | -0.06  |
| RiskA_197_A | -0.01<br>(0.87) | -0.05<br>(0.31) | -0.05<br>(0.33) | -0.17<br>(0.00) | -0.15<br>(0.00) | -0.09   | -0.07  |
| RiskA_197_I | -0.01<br>(0.76) | 0.01<br>(0.86)  | 0.01<br>(0.79)  | -0.06<br>(0.20) | -0.03<br>(0.51) | -0.02   | -0.01  |
| RiskA_50    | 0.01<br>(0.83)  | 0.09<br>(0.06)  | 0.10<br>(0.03)  | -0.11<br>(0.02) | -0.14<br>(0.00) | -0.01   | 0.00   |
| RiskA_189   | 0.01<br>(0.81)  | 0.07<br>(0.17)  | 0.06<br>(0.18)  | -0.14<br>(0.00) | -0.09<br>(0.06) | -0.02   | 0.00   |
| RiskA_243   | 0.03<br>(0.50)  | -0.00<br>(0.93) | 0.03<br>(0.48)  | -0.05<br>(0.26) | -0.01<br>(0.84) | 0.00    | 0.00   |
| RiskA_118   | -0.04<br>(0.43) | 0.06<br>(0.18)  | 0.03<br>(0.56)  | -0.14<br>(0.00) | -0.05<br>(0.34) | -0.03   | -0.03  |
| RiskA_210   | 0.03<br>(0.46)  | 0.09<br>(0.07)  | 0.04<br>(0.45)  | -0.11<br>(0.02) | -0.06<br>(0.17) | 0.00    | 0.01   |
| Average:    | 0.01            | 0.03            | 0.03            | -0.12           | -0.09           | -0.03   |        |
| Median:     | 0.01            | 0.04            | 0.03            | -0.13           | -0.08           |         | -0.01  |

*p*-values in parentheses

depending on the age of the individual (Roberts and DelVecchio, 2000). But psychological surveys tend to be longer; the Moray House Test has 71 items and the Big Five personality test has 44 items. Compared to a preference elicitation, these psychology tests are long and time consuming. Cronbach's  $\alpha$  measures the average correlation between two items in a set of items. It is often used as a measure of internal consistency for a set of items used in a psychometric measure. Cronbach's  $\alpha$ , in our context, gives an estimate of what our test-retest correlation would be if one combined multiple measures into a single metric. For example, if one were to combine the measures of Surveys 189, 276, and 399 for time preference and combine the measures of Surveys 50, 189, and 339 for risk preference, Cronbach's  $\alpha$ s would be 0.66 and 0.65, respectively. From just three measures, this approaches the expected standard in psychology, which sets Cronbach's  $\alpha$  to 0.7 as the threshold for a good psychometric test.

### B.3 Instability

We define instability as the standard deviation of a person's standardized preference parameter. In a fixed sample with perfect measures and no irreducible noise, instability would be 0. There is a tradeoff in our analysis as we include more surveys in our calculation of instability. More measures per person reduces average sampling error, leading to a more accurate instability score. However, more surveys results in a lower sample size, due to less overlap between subjects across surveys. We use a 7-survey sample with  $N = 326$  and 6-survey sample with  $N = 357$  to compare for robustness. More surveys would reduce sample size dramatically. In each sample, every person has taken all the surveys. For instability of risk aversion, we use a 6-survey sample with  $N = 890$  and 5-survey sample with  $N = 1289$ .

### B.4 Predicting Instability

Past work has been unable to find predictors of time- and risk-preference instability. Table B.6, Columns (1) and (2) displays regressions of time-preference instability on observables for the two versions of instability. Cognitive ability categories are jointly significant at the  $p < 0.08$  across both versions. People with higher cognitive ability have less instability, on average, than people with lower cognitive ability. Neither education, nor age robustly predict stability. Interestingly, FICO is not associated with stability either. If people made choices in MEL decisions as theory predicts they would reveal a discount factor equal to their rate of return. It would seem likely that those who have lower access to credit (i.e. lower FICO) would have greater fluctuations in their rate of return depending on whether they are currently liquid or credit constrained, since people with poor credit often have access only to loans with exceedingly high interest rates. However, we find no correlation between FICO and instability. We also regress instability on indicators that take the value of one if there was a major life change. We include change in living situation (married, separated, divorced, widowed, never married), change in job status, and change in income category. We see no effects of any of these status changes on instability.

Table B.6: Correlates of Instability

|                                             | $\beta\delta$     |                    | Risk Aversion       |                    |
|---------------------------------------------|-------------------|--------------------|---------------------|--------------------|
|                                             | (1)               | (2)                | (3)                 | (4)                |
| Log of Income                               | -0.130<br>(0.09)  | 0.003<br>(0.05)    | 0.016<br>(0.03)     | 0.032<br>(0.03)    |
| FICO between 600 and 650                    | -0.005<br>(0.15)  | -0.137<br>(0.15)   | 0.089<br>(0.10)     | 0.023<br>(0.11)    |
| FICO between 650 and 700                    | 0.057<br>(0.15)   | 0.063<br>(0.19)    | 0.042<br>(0.11)     | 0.010<br>(0.11)    |
| FICO between 700 and 750                    | 0.186<br>(0.18)   | -0.029<br>(0.13)   | 0.076<br>(0.09)     | -0.032<br>(0.09)   |
| FICO between 750 and 800                    | -0.007<br>(0.15)  | -0.145<br>(0.14)   | 0.038<br>(0.09)     | -0.095<br>(0.09)   |
| FICO between 800 and 850                    | -0.042<br>(0.15)  | -0.171<br>(0.14)   | 0.063<br>(0.09)     | -0.043<br>(0.09)   |
| Financial Literacy                          | 0.009<br>(0.06)   | -0.006<br>(0.04)   | -0.072***<br>(0.03) | -0.081**<br>(0.03) |
| Cognitive Ability level 1                   | 0.161<br>(0.11)   | 0.022<br>(0.12)    | 0.028<br>(0.07)     | 0.094<br>(0.09)    |
| Cognitive Ability level 2                   | 0.187*<br>(0.10)  | 0.048<br>(0.12)    | -0.005<br>(0.06)    | -0.002<br>(0.08)   |
| Cognitive Ability level 3                   | 0.079<br>(0.08)   | -0.112<br>(0.10)   | -0.037<br>(0.07)    | 0.030<br>(0.08)    |
| Cognitive Ability level 4                   | -0.031<br>(0.08)  | -0.216**<br>(0.10) | -0.084<br>(0.06)    | -0.029<br>(0.08)   |
| Cognitive Ability level 5                   | 0.003<br>(0.08)   | -0.160<br>(0.11)   | -0.093<br>(0.07)    | 0.014<br>(0.09)    |
| Change in Living Situation                  | 0.053<br>(0.09)   | 0.064<br>(0.09)    | -0.090<br>(0.06)    | 0.013<br>(0.07)    |
| Change in Job Status                        | -0.025<br>(0.08)  | 0.041<br>(0.05)    | 0.029<br>(0.04)     | -0.026<br>(0.04)   |
| Change in income category                   | -0.130<br>(0.08)  | -0.085<br>(0.07)   | -0.003<br>(0.03)    | -0.012<br>(0.04)   |
| Constant                                    | 1.936**<br>(0.80) | 1.408***<br>(0.50) | 1.245***<br>(0.46)  | 0.970*<br>(0.51)   |
| Mean of Dep Var                             | .836              | .826               | .88                 | .828               |
| P-value of Joint Test for Education         | 0.275             | 0.130              | 0.078               | 0.493              |
| P-value of Joint Test for Age               | 0.037             | 0.124              | 0.108               | 0.677              |
| P-value of Joint Test for FICO              | 0.261             | 0.287              | 0.870               | 0.406              |
| P-value of Joint Test for Cognitive Ability | 0.077             | 0.015              | 0.126               | 0.567              |
| $\bar{R}^2$                                 | 0.145             | 0.149              | 0.117               | 0.079              |
| N                                           | 287               | 315                | 363                 | 393                |

Notes: Columns (1) and (2) regress the instability of BetaDelta and Columns (3) and (4) regress the instability of Risk Aversion, both using OLS with robust standard errors. Demographic controls include log value of income, age, age squared, female, and 16 education categories. The omitted reference category for FICO and cognitive ability are “FICO between 0 and 600” and “cognitive ability level 0”. In Column (1) instability is the standard deviation of standardized BetaDeltas from seven surveys: two of them use pay-format MPLs (Survey14, Survey248), one is a pay-format titration (survey11), one uses CTB (survey 212), and the rest three are receive-format titrations (Survey10, Survey189, and Survey399). The seven surveys are chosen because they have the highest overlapping sample size among all seven surveys combinations. We use a stepwise process to drop the survey drop that maximizes the sample size. In Column (2) we drop Survey 212. In Column (3) instability is the standard deviation of standardized risk aversions from six surveys: two job context Titration (survey197\_h, survey197\_a), one insurance context Titration (survey197\_i), two investment context Titration (survey50, survey189), one ball-format Titration (survey243), one retirement saving context Titration (survey118) and one MPL (survey210). The six surveys are chosen because they have the highest overlapping sample size among all six surveys combinations. We use a stepwise process to drop the survey drop that maximizes the sample size. In Column (4) we drop survey197\_h, survey197\_a, and survey197\_i. \* Significant at the 10% level; \*\* at the 5% level; \*\*\* at the 1% level.

Instability in risk preferences is presented in Table B.6 in Columns (3) and (4). We find that financial literacy increases stability. This appears quite plausible as those who are more literate may also have developed more systematic ways to make financial decisions, while those who are illiterate may behave in a more contextual way. We find no correlation between cognitive ability and instability. In contrast, [Dohmen et al. \(2018\)](#) find that higher cognitive ability is often related with consistent risk choices on an MPL elicitation.

The instability in time preferences and the instability in risk preferences are weakly correlated with each other. Again, we trade off the number of measures per subject with the number of subjects. If we take our deeper sample with 7 time-preference measures and 6 risk-preference measures, the correlation between the two instabilities is 0.12 with p-value of 0.06, and  $N = 245$ . If we use 6 time-preference measures and 5 risk-preference measures, the correlation is 0.09 with p-value of 0.14, and  $N = 283$ .

## B.5 Why Do Elicited Measures Change Over Time?

Instability could come from irreducible risk or from changes in the person and environment that affect subject responses. Here we analyze how the elicited parameter measures vary as a function of subject status. In Tables B.6 instability is the outcome variable. Because instability is a function of which surveys are used we use the same surveys for each individual. The analysis also requires many surveys per individual to get a reliable measure of instability. These requirements greatly shrink the sample. In this section we expand the sample by relaxing these requirements and regress preference parameters directly on observables in an individual fixed-effect panel regression.

Table B.7 displays how standardized  $\beta\delta$  and risk aversion vary. We regress the measures on income categories, age categories, living situations and job status. Standard errors are clustered at the individual level. Table B.7 shows that income categories and age categories are jointly significant for  $\beta\delta$ . People have higher  $\beta\delta$  when they have higher incomes and are older. Living situation indicators are jointly significant for risk aversion, where “widowed” and “never married” tend to be less risk averse than “married”.

Consistent with [Krupka and Stephens \(2013\)](#) we find some evidence that time preferences change as individuals age and as their income changes. Marital status seems to have a significant effect on risk preferences. While this is suggestive that some of the instability comes from observed changes in individual status, the variation is largely unexplained. The variation that can be explained by within-person changes is less than 1%.

Table B.7: Panel Regression of Standardized Parameters on Individual Characteristics

|                                            | (1)           | (2)           |
|--------------------------------------------|---------------|---------------|
|                                            | $\beta\delta$ | Risk Aversion |
| Living Situation Separated                 | -0.259*       | 0.088         |
|                                            | (0.15)        | (0.09)        |
| Living Situation Divorced                  | -0.020        | 0.034         |
|                                            | (0.08)        | (0.08)        |
| Living Situation Widowed                   | -0.079        | -0.331***     |
|                                            | (0.13)        | (0.10)        |
| Living Situation Never married             | -0.058        | -0.156*       |
|                                            | (0.12)        | (0.09)        |
| Job Status Other                           | -0.060        | -0.095        |
|                                            | (0.09)        | (0.07)        |
| Job Status Homemaker                       | 0.052         | 0.044         |
|                                            | (0.09)        | (0.07)        |
| Job Status Retired                         | 0.121         | -0.010        |
|                                            | (0.08)        | (0.06)        |
| Job Status Disabled                        | -0.185*       | 0.064         |
|                                            | (0.11)        | (0.10)        |
| Job Status Temporarily laid off            | -0.009        | -0.082        |
|                                            | (0.12)        | (0.09)        |
| Job Status Unemployed                      | 0.100         | 0.012         |
|                                            | (0.08)        | (0.06)        |
| Job Status Working now                     | 0.003         | 0.053         |
|                                            | (0.06)        | (0.05)        |
| Constant                                   | -0.119        | 0.120         |
|                                            | (0.19)        | (0.13)        |
| P-value of Joint Test for Income           | 0.001         | 0.509         |
| P-value of Joint Test for Age Categories   | 0.002         | 0.078         |
| P-value of Joint Test for Living Situation | 0.449         | 0.005         |
| P-value of Joint Test for Job Status       | .229          | .423          |
| $\bar{R}^2$                                | .00902        | .00239        |
| Number of Clusters                         | 6,290         | 6,511         |
| N                                          | 14,602        | 25,662        |

Notes: Dependent variable is normalized  $\beta\delta$  for column (1), and risk aversion for column (2). Normalized  $\beta\delta$  is calculated from MPL and staircase surveys. Predictors include 17 income categories, 6 age categories, 5 living situations, and 7 job status. The omitted reference categories for income, age and living situation are respectively “Family income less than 5000”, “Age less than 30”, and “Living situation married”. In column (1), coefficient of “Age more than 70” is omitted because of collinearity. \* Significant at the 10% level; \*\* at the 5% level; \*\*\* at the 1% level.

## Appendix C Additional Results

Figures C.1-C.5 display the distributions of income, age, education, gender, and ethnicity across the surveys.

Figure C.1: Income Distributions Across Surveys

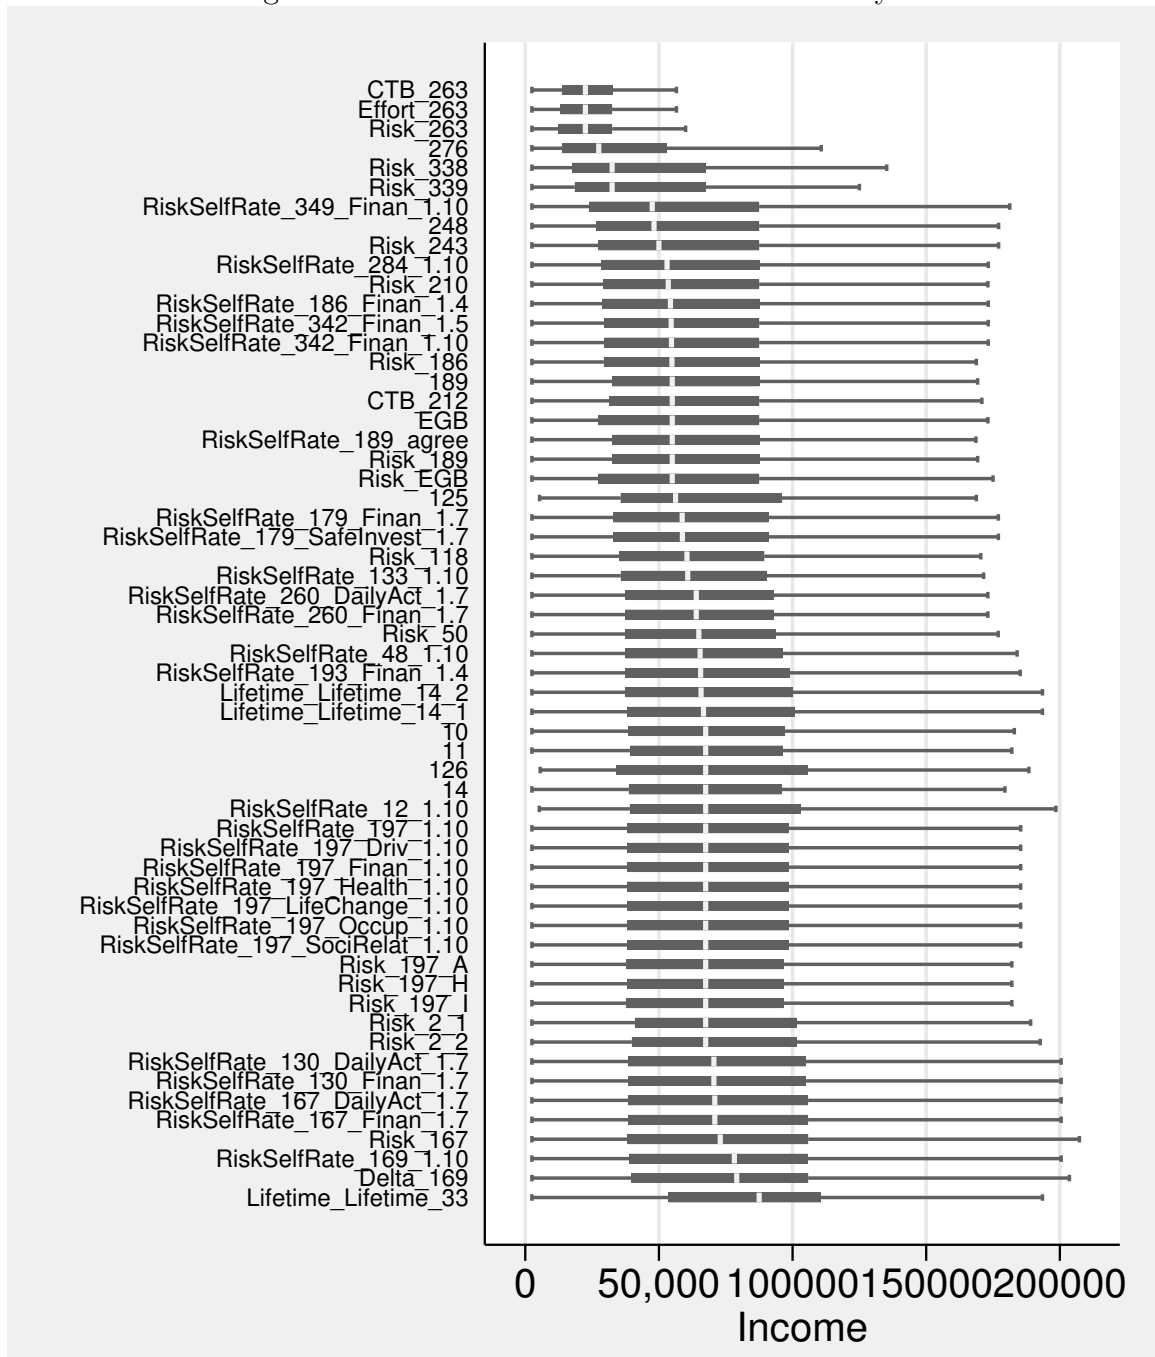

Notes: The bounds of whiskers represent upper and lower adjacent values. The bounds of boxes show 25th and 75th percentiles. The white strips in the middle are medians.

Figure C.2: Age Distributions Across Surveys

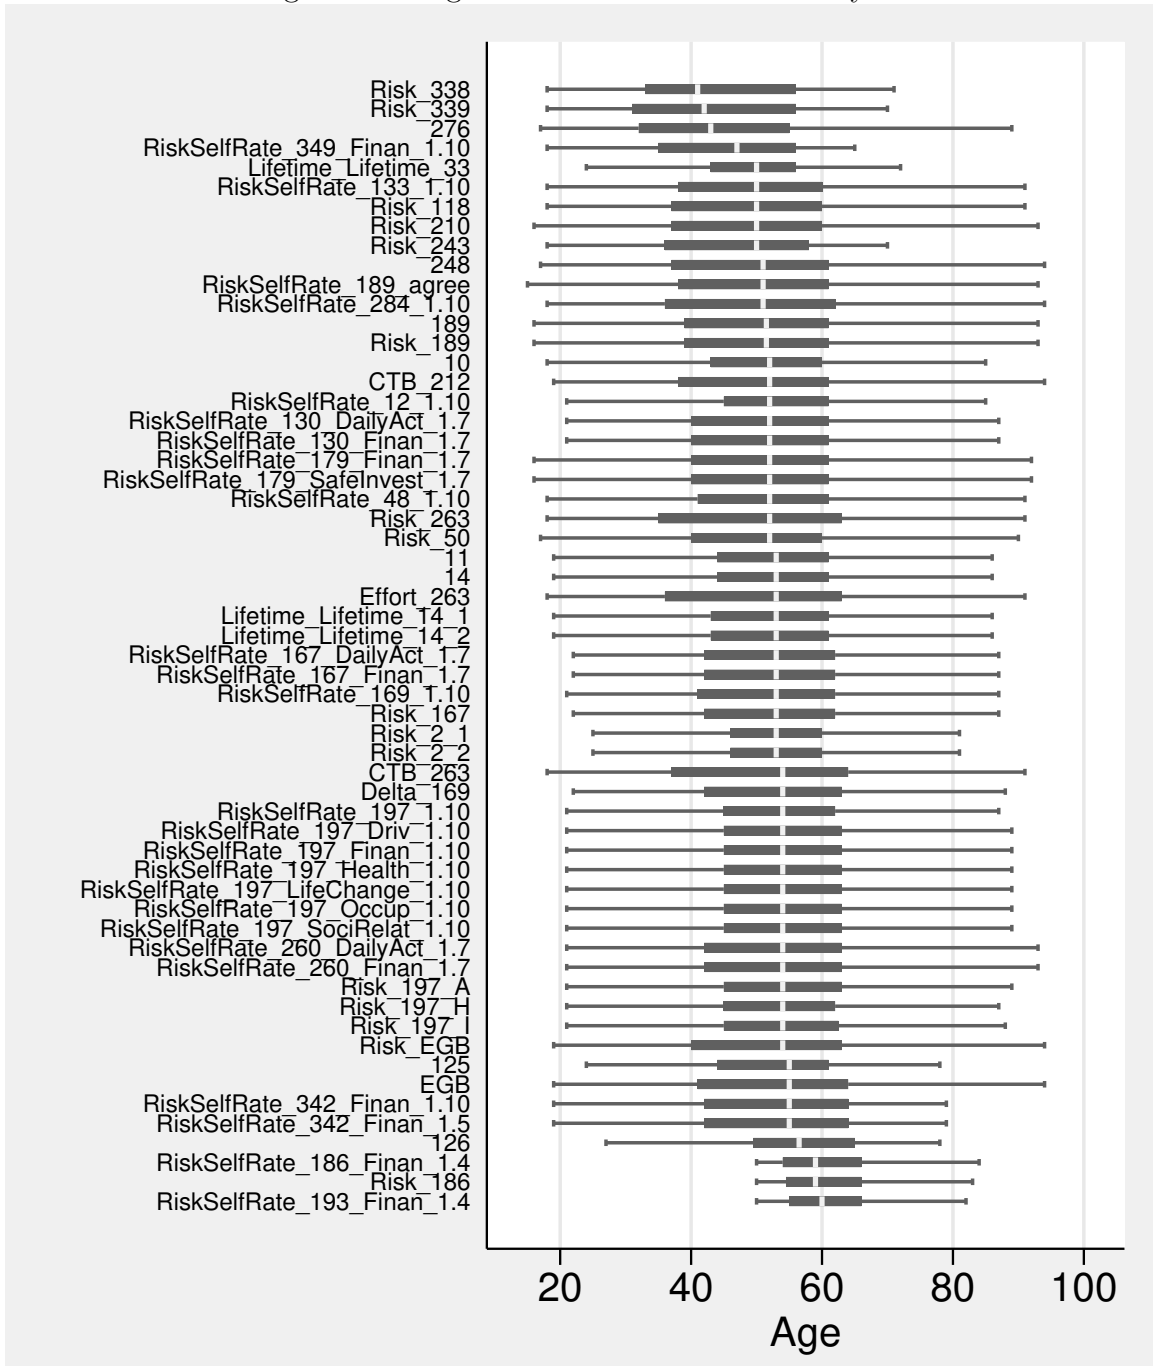

Notes: The bounds of whiskers represent upper and lower adjacent values. The bounds of boxes show 25th and 75th percentiles. The white strips in the middle are medians.

Figure C.3: Education Distributions Across Surveys

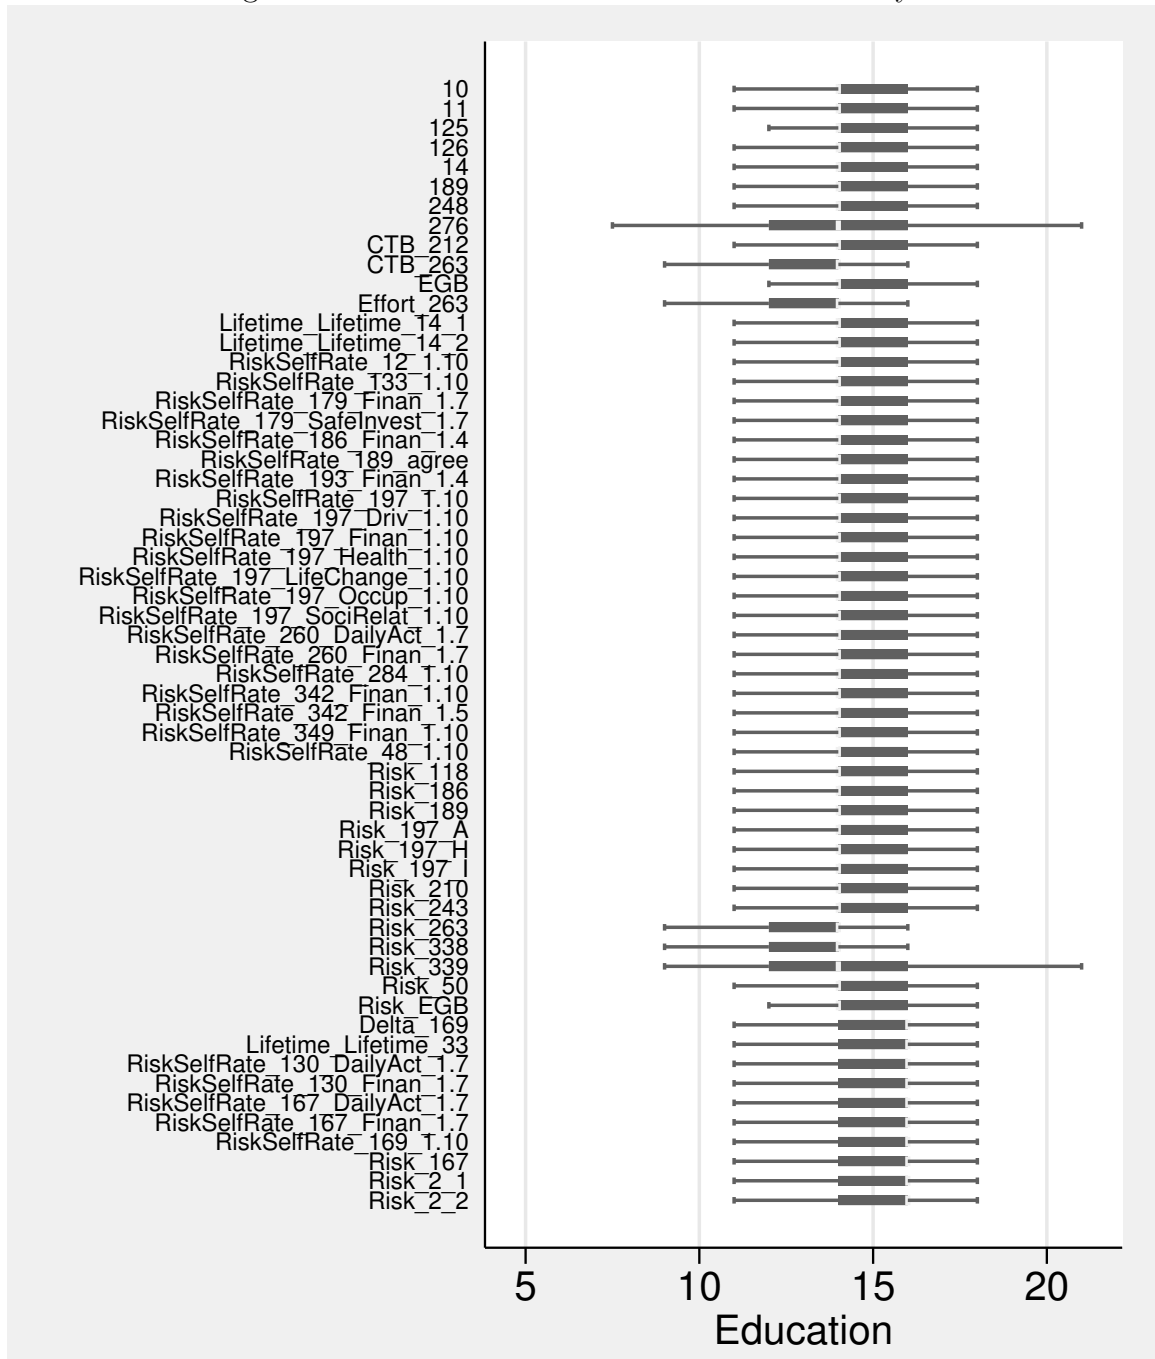

Notes: The bounds of whiskers represent upper and lower adjacent values. The bounds of boxes show 25th and 75th percentiles. The white strips in the middle are medians.

Figure C.4: Gender Distributions Across Surveys

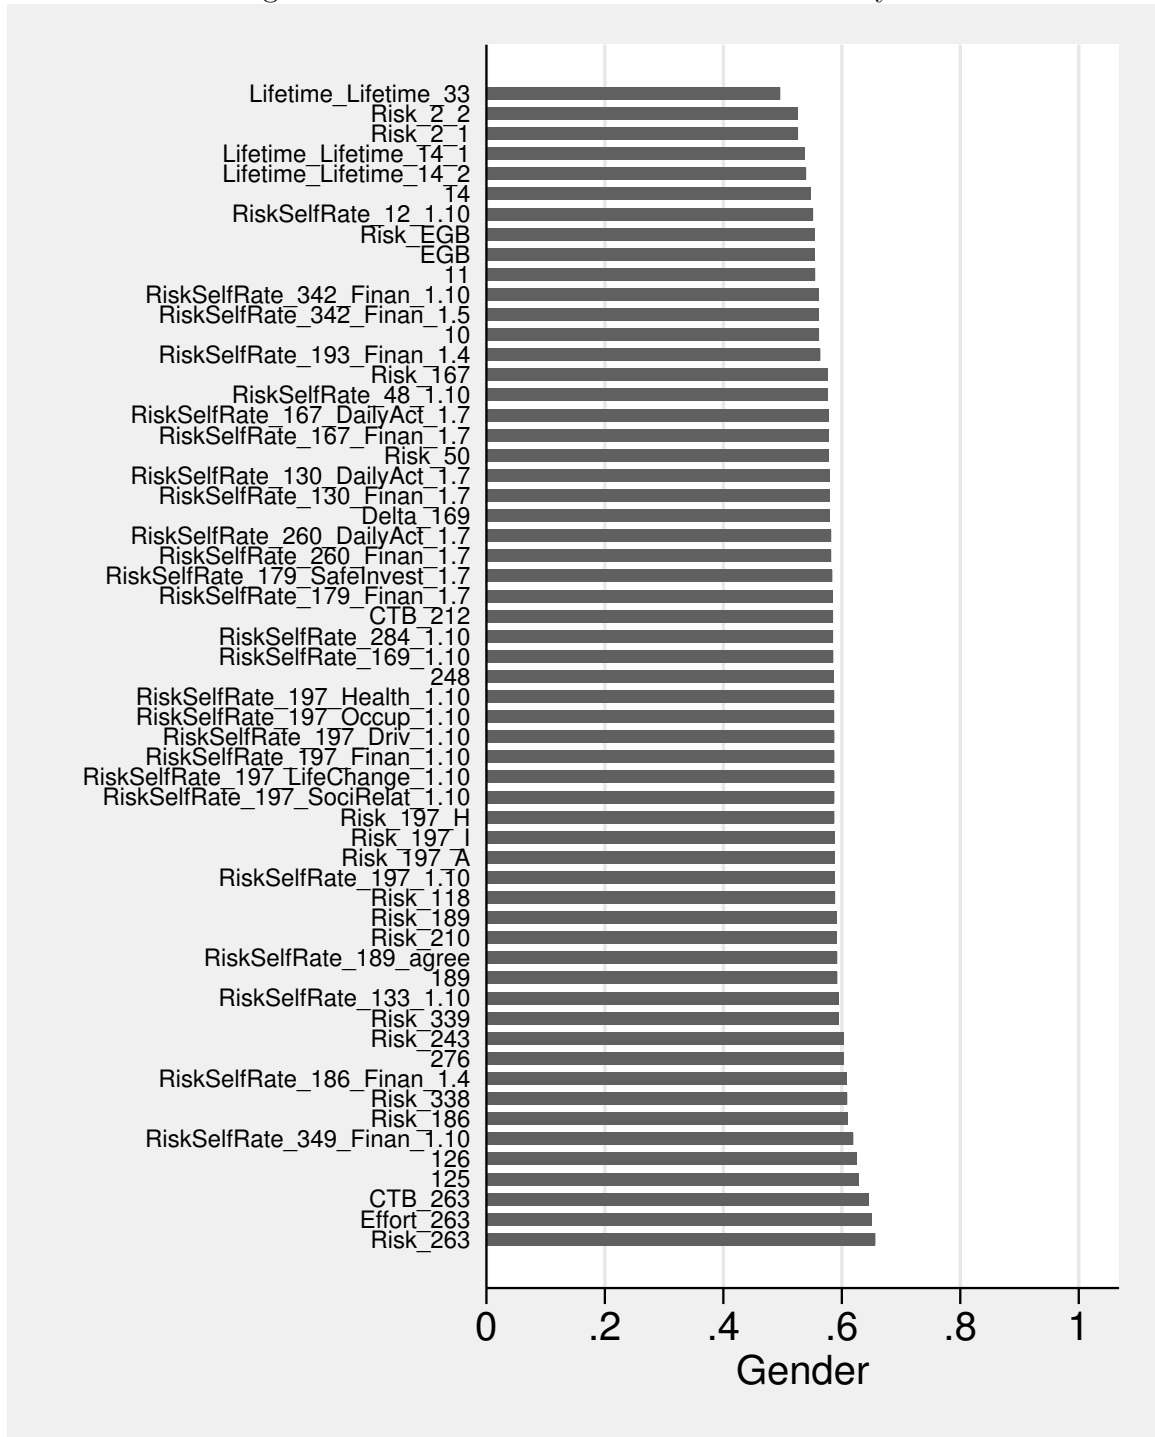

Notes: The bounds of whiskers represent upper and lower adjacent values. The bounds of boxes show 25th and 75th percentiles. The white strips in the middle are medians.

Figure C.5: Ethnicity Distributions Across Surveys

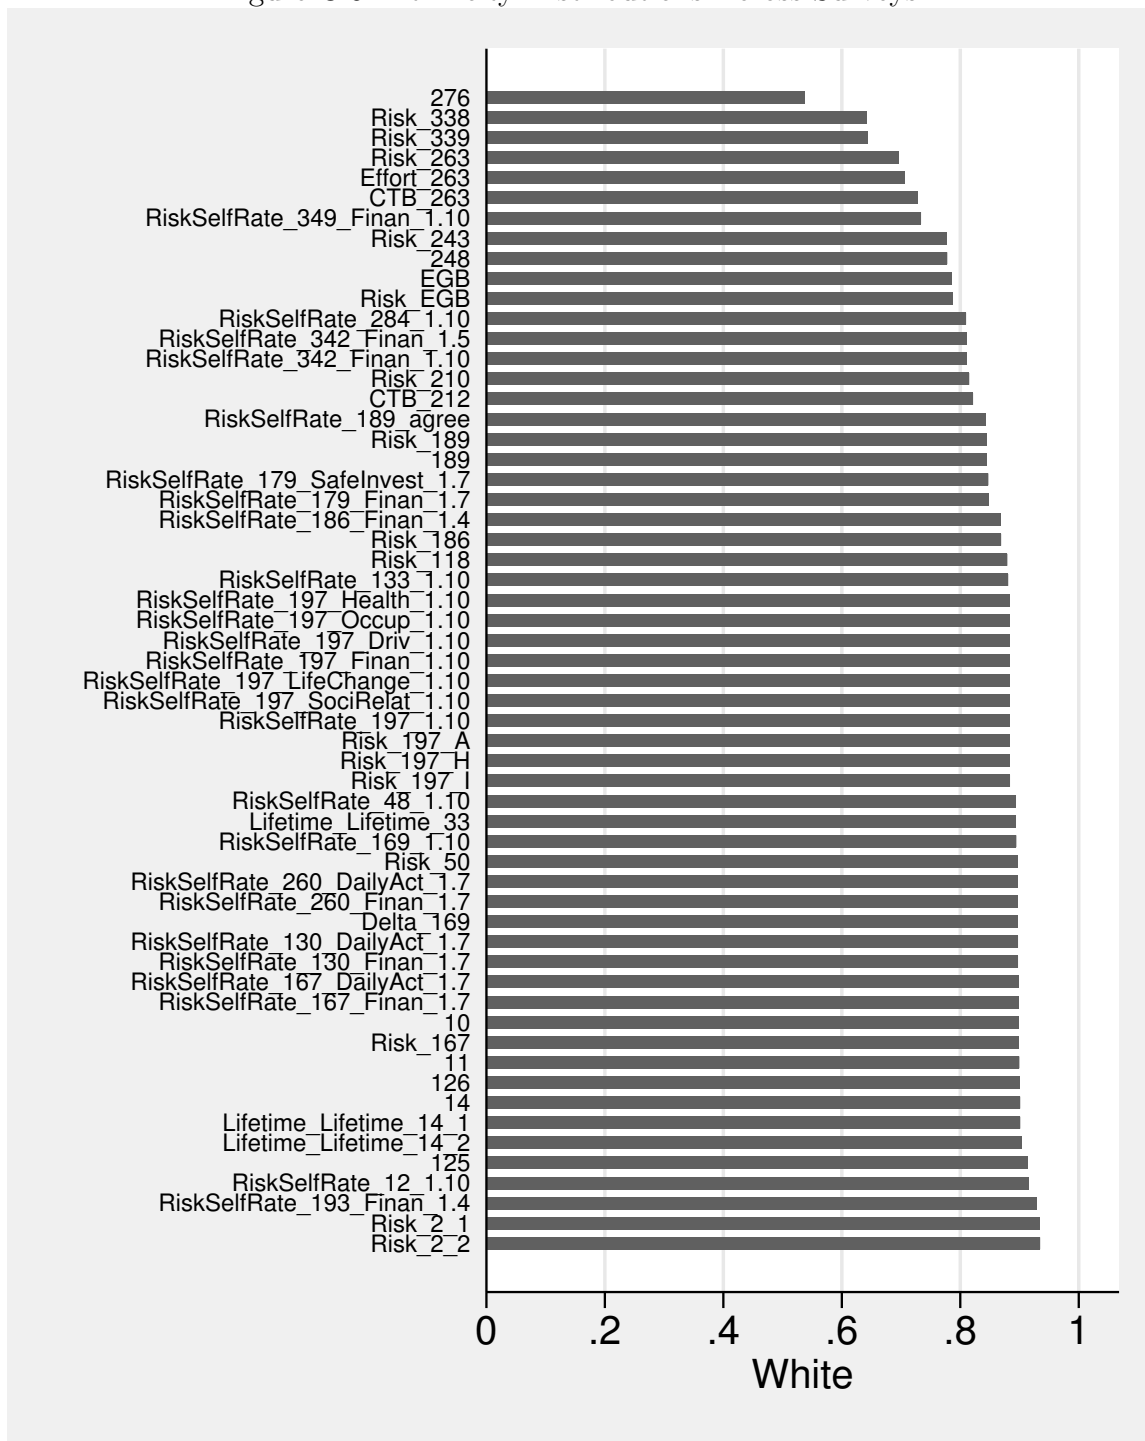

Notes: The bounds of whiskers represent upper and lower adjacent values. The bounds of boxes show 25th and 75th percentiles. The white strips in the middle are medians.

Tables C.1 and C.2 show the results of regressing every outcome used in this paper on every time-preference and risk-preference measure, respectively. In addition to reporting naive p-values, we also report false-discovery rate (FDR) q-values which correct for multiple hypothesis testing. The set of regressions included in the FDR analysis is the set statistical tests anywhere in the paper for which we report a q-value.

Table C.1: Financial and Health Outcomes Regressed on All Standardized Values of  $\beta\delta$

|                                         | Health                         | Any Stock                      | Live Longer 85               | Bankruptcy                      | Pay off Debt                   | Checking Savings Amount             |
|-----------------------------------------|--------------------------------|--------------------------------|------------------------------|---------------------------------|--------------------------------|-------------------------------------|
| $\beta\delta_{11}$ (Titration Pay)      | 0.00<br>(0.05) [1.000] 377     | 0.04***<br>(0.01) [0.090] 377  | 0.57<br>(1.35) [1.000] 375   | -0.03<br>(0.02) [0.445] 371     | 0.05**<br>(0.02) [0.133] 365   | 953.08<br>(599.62) [0.449] 349      |
| $\beta\delta_{10}$ (Titration Receive)  | 0.01<br>(0.04) [1.000] 385     | 0.01<br>(0.02) [1.000] 384     | -0.27<br>(1.30) [1.000] 383  | -0.04**<br>(0.02) [0.098] 379   | 0.02<br>(0.03) [0.965] 371     | 986.62<br>(755.55) [0.653] 353      |
| $\beta\delta_{276}$ (Titration Receive) | 0.08**<br>(0.04) [0.222] 593   | 0.06***<br>(0.01) [0.003] 431  | 0.146<br>(1.24) [0.543] 584  | -0.03***<br>(0.01) [0.045] 445  | 0.10***<br>(0.03) [0.006] 294  | 1416.41**<br>(495.90) [0.049] 360   |
| $\beta\delta_{189}$ (Titration Receive) | 0.01<br>(0.03) [1.000] 922     | 0.05***<br>(0.01) [0.009] 864  | 0.487<br>(0.80) [1.000] 920  | -0.03***<br>(0.01) [0.028] 896  | 0.09***<br>(0.02) [0.001] 792  | 1807.98***<br>(438.67) [0.001] 807  |
| $\beta\delta_{399}$ (Titration Receive) | 0.03<br>(0.02) [0.787] 1494    | 0.05***<br>(0.01) [0.001] 1259 | 0.192<br>(0.66) [0.653] 1474 | -0.03***<br>(0.01) [0.011] 1296 | 0.06***<br>(0.01) [0.001] 1062 | 1177.92***<br>(324.87) [0.008] 1107 |
| $\beta\delta_{14}$ (MPL Pay)            | -0.05<br>(0.03) [0.449] 424    | 0.01<br>(0.02) [1.000] 423     | 0.598<br>(1.01) [1.000] 422  | 0.02*<br>(0.01) [0.417] 418     | 0.05***<br>(0.02) [0.034] 410  | 1395.50***<br>(507.46) [0.064] 388  |
| $\beta\delta_{248}$ (MPL Pay)           | 0.08***<br>(0.03) [0.036] 1218 | 0.03***<br>(0.01) [0.021] 1073 | 0.221<br>(0.82) [0.680] 1208 | -0.00<br>(0.01) [1.000] 1094    | 0.07***<br>(0.02) [0.006] 934  | 1131.78***<br>(347.52) [0.021] 961  |
| $\delta_{169}$ (MPL Receive)            | 0.03<br>(0.04) [1.000] 285     | 0.03<br>(0.02) [0.687] 285     | 0.204<br>(1.53) [0.663] 284  | -0.03<br>(0.02) [0.444] 284     | 0.08**<br>(0.03) [0.105] 276   | 1077.96<br>(778.07) [0.578] 266     |
| $\beta\delta_{ctb\_212}$ (CTB)          | 0.03<br>(0.03) [0.855] 930     | 0.02<br>(0.01) [0.449] 841     | 0.939<br>(1.35) [1.000] 925  | 0.00<br>(0.01) [1.000] 859      | 0.00<br>(0.02) [1.000] 767     | -290.52<br>(456.67) [1.000] 762     |
| $\beta\delta_{ctb\_263}$ (CTB)          | 0.05<br>(0.05) [0.860] 271     | -0.02*<br>(0.01) [0.382] 224   | 0.159<br>(1.66) [0.576] 264  | -0.03**<br>(0.01) [0.227] 230   | 0.377<br>(0.05) [0.910] 178    | -291.89<br>(369.34) [0.965] 205     |
| Lifetime_14_1                           | 0.04<br>(0.04) [0.855] 366     | 0.03<br>(0.02) [0.675] 365     | 0.390<br>(1.32) [0.926] 365  | 0.01<br>(0.02) [1.000] 362      | 0.02<br>(0.03) [0.965] 354     | 169.09<br>(717.40) [1.000] 337      |
| Lifetime_14_2                           | 0.05<br>(0.04) [0.756] 377     | 0.03<br>(0.02) [0.548] 376     | 0.974<br>(1.29) [1.000] 376  | -0.00<br>(0.02) [1.000] 373     | 0.03<br>(0.03) [0.860] 366     | 625.73<br>(673.10) [0.887] 349      |
| Lifetime_33                             | 0.00<br>(0.04) [1.000] 312     | 0.04*<br>(0.02) [0.286] 313    | 0.684<br>(1.44) [1.000] 313  | 0.00<br>(0.02) [1.000] 311      | 0.01<br>(0.03) [1.000] 305     | 978.21<br>(808.33) [0.687] 290      |
| $\beta\delta_{263}$ (Real Effort)       | 0.05<br>(0.06) [0.934] 299     | -0.02<br>(0.02) [0.733] 250    | 0.028<br>(1.53) [0.188] 294  | 0.00<br>(0.02) [1.000] 254      | 0.02<br>(0.04) [1.000] 187     | -1319.83**<br>(557.49) [0.135] 222  |
| ForFuture (SPQ)                         | 0.05**<br>(0.02) [0.222] 1495  | 0.04***<br>(0.01) [0.001] 1260 | 0.149<br>(0.67) [0.548] 1475 | -0.01<br>(0.01) [0.449] 1297    | 0.03**<br>(0.01) [0.191] 1064  | 711.14**<br>(336.99) [0.222] 1107   |

Notes: OLS with robust standard errors. Controls include cognitive ability, financial literacy, risk aversion, 17 income categories, 6 age categories, indicator variable for female, 16 education categories, and 5 race categories. \* Significant at the 10% level; \*\* at the 5% level; \*\*\* at the 1% level. Naive p-values are reported in italics, FDR adjusted q-values are reported in brackets. The third column in each cell reports  $N$ .



Table C.1: Financial and Health Outcomes Regressed on All Standardized Values of  $\beta\delta$  (Continued)

|                                           | Fruit Vege                       | Cereal Fiber                      | Go to Doctor Routinely            | Low dose of Aspirin                | Smoking                            | Payday Loan                           | Medical Insurance |
|-------------------------------------------|----------------------------------|-----------------------------------|-----------------------------------|------------------------------------|------------------------------------|---------------------------------------|-------------------|
| $\beta\delta_{\_11}$ (Titration Pay)      | -0.01 [0.832] 363 (0.07) [1.000] | -0.07 [0.359] 364 (0.07) [0.892]  | 0.06** [0.042] 364 (0.03) [0.241] | 0.05*** [0.006] 364 (0.02) [0.058] | -0.02 [0.517] 374 (0.04) [1.000]   | 0.828 [1.000] 195 (0.02) [0.142] 261  |                   |
| $\beta\delta_{\_10}$ (Titration Receive)  | 0.06 [0.516] 371 (0.09) [1.000]  | 0.09 [0.248] 372 (0.08) [0.729]   | -0.01 [0.650] 372 (0.03) [1.000]  | 0.05* [0.280] 372 (0.03) [0.280]   | -0.01 [0.744] 382 (0.04) [1.000]   | 0.869 [1.000] 201 (0.01) [0.787] 265  |                   |
| $\beta\delta_{\_276}$ (Titration Receive) | 2.17 [0.001] 28 (.) [0.001]      | -0.28 [0.000] 28 (.) [0.001]      | -0.40 [0.000] 28 (.) [0.001]      | -1.54 [0.000] 28 (.) [0.001]       | -0.09* [0.289] 378 (0.05) [0.289]  | 0.989 [1.000] 285 (0.02) [0.064] 507  |                   |
| $\beta\delta_{\_189}$ (Titration Receive) | 0.08 [0.165] 786 (0.06) [0.578]  | 0.10* [0.061] 787 (0.05) [0.301]  | 0.00 [0.809] 787 (0.02) [1.000]   | 0.01 [0.641] 787 (0.02) [1.000]    | -0.05 [0.114] 923 (0.03) [0.449]   | 0.013 [1.000] 503 (0.01) [0.710] 657  |                   |
| $\beta\delta_{\_399}$ (Titration Receive) | 0.10* [0.059] 820 (0.05) [0.294] | 0.03 [0.532] 821 (0.03) [0.729]   | -0.01 [0.757] 821 (0.02) [1.000]  | -0.00 [0.903] 821 (0.02) [1.000]   | 0.162 [1.000] 1211 (0.04) [0.162]  | 0.001 [1.000] 756 (0.01) [0.235] 1157 |                   |
| $\beta\delta_{\_14}$ (MPL Pay)            | 0.02 [0.799] 406 (0.08) [1.000]  | 0.14** [0.022] 407 (0.06) [0.150] | -0.02 [0.481] 407 (0.02) [1.000]  | 0.05*** [0.004] 407 (0.02) [0.040] | 0.845 [1.000] 418 (0.04) [1.000]   | 0.673 [1.000] 221 (0.03) [0.309] 292  |                   |
| $\beta\delta_{\_248}$ (MPL Pay)           | 0.05 [0.527] 749 (0.07) [0.810]  | 0.07 [0.810] 750 (0.06) [0.150]   | 0.01 [0.811] 750 (0.02) [1.000]   | 0.03 [0.136] 750 (0.02) [0.040]    | 1.066 [1.000] 1066 (0.04) [1.000]  | 0.018 [1.000] 643 (0.02) [0.818] 917  |                   |
| $\delta_{\_169}$ (MPL Receive)            | 0.17* [0.056] 285 (0.09) [0.286] | 0.10 [0.321] 285 (0.07) [0.810]   | 0.02 [0.581] 285 (0.02) [1.000]   | -0.00 [0.953] 285 (0.02) [0.516]   | 0.346 [1.000] 285 (0.04) [0.578]   | 0.372 [1.000] 160 (0.01) [0.209] 199  |                   |
| $\beta\delta_{\_ctb\_212}$ (CTB)          | -0.01 [0.910] 696 (0.07) [1.000] | -0.04 [0.700] 697 (0.10) [0.845]  | 0.03 [0.340] 697 (0.03) [1.000]   | 0.01 [0.608] 697 (0.03) [1.000]    | 0.866 [1.000] 931 (0.05) [0.872]   | 0.511 [1.000] 488 (0.02) [0.478] 683  |                   |
| $\beta\delta_{\_ctb\_263}$ (CTB)          | -0.01 [0.917] 112 (0.14) [1.000] | 0.18 [0.230] 112 (0.15) [0.688]   | 0.00 [0.987] 112 (0.04) [1.000]   | 0.02 [0.626] 112 (0.05) [1.000]    | -0.17** [0.222] 206 (0.08) [0.222] | 0.433 [1.000] 160 (0.02) [0.988] 190  |                   |
| Lifetime_14_1                             | -0.00 [0.985] 352 (0.08) [1.000] | 0.05 [0.575] 353 (0.08) [1.000]   | -0.01 [0.860] 353 (0.03) [1.000]  | -0.02 [0.464] 353 (0.03) [1.000]   | 0.663 [1.000] 361 (0.04) [1.000]   | 0.647 [1.000] 188 (0.03) [0.146] 250  |                   |
| Lifetime_14_2                             | -0.13 [0.114] 363 (0.08) [0.449] | -0.04 [0.566] 364 (0.04) [1.000]  | 0.03 [0.349] 364 (0.03) [0.882]   | -0.00 [0.966] 364 (0.03) [1.000]   | 0.577 [1.000] 372 (0.02) [0.577]   | 0.419 [1.000] 196 (0.02) [0.053] 257  |                   |
| Lifetime_33                               | 0.05 [0.600] 304 (0.09) [1.000]  | -0.04 [0.636] 305 (0.09) [1.000]  | 0.00 [0.924] 305 (0.03) [1.000]   | 0.00 [0.922] 305 (0.03) [1.000]    | 0.613 [1.000] 311 (0.05) [1.000]   | 0.114 [1.000] 170 (0.01) [0.767] 267  |                   |
| $\beta\delta_{\_263}$ (Real Effort)       | 0.04 [0.776] 118 (0.15) [1.000]  | -0.02 [0.874] 118 (0.09) [1.000]  | 0.04 [0.398] 118 (0.04) [0.934]   | -0.02 [0.652] 118 (0.02) [0.652]   | 0.837 [1.000] 224 (0.02) [0.837]   | 0.849 [1.000] 172 (0.00) [0.926] 219  |                   |
| ForFuture (SPQ)                           | 0.11* [0.060] 823 (0.06) [0.298] | 0.09 [0.111] 824 (0.14) [1.000]   | 0.01 [0.509] 824 (0.05) [0.934]   | -0.02 [0.341] 824 (0.02) [0.341]   | 0.256 [1.000] 1213 (0.08) [1.000]  | 0.169 [1.000] 756 (0.03) [0.147] 1157 |                   |
|                                           |                                  |                                   |                                   |                                    |                                    |                                       |                   |

Notes: OLS with robust standard errors. Controls include cognitive ability, financial literacy, risk aversion, 17 income categories, 6 age categories, indicator variable for female, 16 education categories, and 5 race categories. \* Significant at the 10% level; \*\* at the 5% level; \*\*\* at the 1% level. Naive p-values are reported in italics, FDR adjusted q-values are reported in brackets. The third column in each cell reports  $N$ .

Table C.2: Financial and Health Outcomes Regressed on All Standardized Values of Risk Preference

|                                             | Health   |         |       | Any Stock |         |       | Live Longer 85 |         |       | Bankruptcy |         |       | Pay off Debt |         |      | Checking Savings Amount |         |     |
|---------------------------------------------|----------|---------|-------|-----------|---------|-------|----------------|---------|-------|------------|---------|-------|--------------|---------|------|-------------------------|---------|-----|
|                                             |          |         |       |           |         |       |                |         |       |            |         |       |              |         |      |                         |         |     |
| Risk Avers 167 (Titration Hypothetical Job) | 0.05     | 0.277   | 288   | -0.01     | 0.797   | 288   | -3.47**        | 0.019   | 288   | 0.00       | 0.955   | 288   | 0.03         | 0.375   | 279  | -0.62                   | 0.999   | 271 |
|                                             | (0.04)   | [0.763] |       | (0.02)    | [1.000] |       | (1.47)         | [0.135] |       | (0.02)     | [1.000] |       | (0.03)       | [0.905] |      | (696.18)                | [1.000] |     |
| Risk Avers 197 (Titration Hypothetical Job) | 0.02     | 0.616   | 692   | -0.03*    | 0.075   | 681   | 0.11           | 0.906   | 690   | -0.01      | 0.471   | 692   | 0.01         | 0.426   | 644  | 212.35                  | 0.669   | 642 |
|                                             | (0.03)   | [1.000] |       | (0.01)    | [0.333] |       | (0.95)         | [1.000] |       | (0.01)     | [1.000] |       | (0.02)       | [0.965] |      | (496.17)                | [1.000] |     |
| Risk Avers 197 (Titration Alternative Job)  | 0.03     | 0.380   | 692   | -0.03**   | 0.029   | 681   | -1.28          | 0.165   | 690   | 0.01       | 0.366   | 692   | 0.02         | 0.400   | 644  | -609.55                 | 0.188   | 642 |
|                                             | (0.03)   | [0.915] |       | (0.01)    | [0.191] |       | (0.92)         | [0.578] |       | (0.01)     | [0.897] |       | (0.02)       | [0.939] |      | (462.90)                | [0.645] |     |
| Risk Avers 197 (Titration Insurance)        | -0.07**  | 0.015   | 692   | 0.02      | 0.296   | 681   | -0.34          | 0.707   | 690   | 0.02**     | 0.037   | 692   | -0.03        | 0.165   | 644  | 547.74                  | 0.246   | 642 |
|                                             | (0.03)   | [0.114] |       | (0.01)    | [0.793] |       | (0.91)         | [1.000] |       | (0.02)     | [0.578] |       | (0.02)       | [0.578] |      | (471.64)                | [0.728] |     |
| Risk Avers 50 (Titration Inheritance)       | 0.04     | 0.194   | 621   | -0.03*    | 0.069   | 619   | -1.07          | 0.291   | 617   | 0.00       | 0.931   | 610   | -0.02        | 0.423   | 597  | 191.53                  | 0.734   | 565 |
|                                             | (0.03)   | [0.653] |       | (0.02)    | [0.322] |       | (1.01)         | [0.791] |       | (0.01)     | [1.000] |       | (0.02)       | [0.965] |      | (562.75)                | [1.000] |     |
| Risk Avers 189 (Titration Inheritance)      | -0.04    | 0.144   | 922   | -0.04**   | 0.002   | 864   | -1.35          | 0.110   | 920   | 0.01       | 0.619   | 896   | -0.00        | 0.882   | 793  | 81.83                   | 0.848   | 806 |
|                                             | (0.03)   | [0.537] |       | (0.01)    | [0.027] |       | (0.84)         | [0.449] |       | (0.01)     | [1.000] |       | (0.02)       | [1.000] |      | (425.87)                | [1.000] |     |
| Risk Avers 399 (Eckel & Grossman)           | 0.397    | 1420    | -0.02 | 0.722     | 1190    | -0.00 | 0.492          | 1400    | -0.45 | 0.353      | 1229    | 0.01  | 0.861        | 1065    | 0.00 | 0.914                   | 1045    |     |
|                                             | (0.02)   | [0.934] |       | (0.01)    | [1.000] |       | (0.66)         | [1.000] |       | (0.01)     | [0.887] |       | (0.01)       | [1.000] |      | (326.64)                | [1.000] |     |
| Risk Avers 263 (Eckel & Grossman)           | 0.280    | 339     | -0.06 | 0.345     | 282     | -0.02 | 0.206          | 333     | -1.88 | 0.791      | 287     | -0.00 | 0.427        | 213     | 0.03 | 0.240                   | 252     |     |
|                                             | (0.05)   | [0.766] |       | (0.02)    | [0.871] |       | (1.48)         | [0.668] |       | (0.02)     | [1.000] |       | (0.03)       | [0.965] |      | (527.65)                | [0.715] |     |
| Risk Avers 243 (Titration Ball)             | 0.01     | 0.588   | 1043  | -0.01     | 0.482   | 933   | -0.96          | 0.217   | 1036  | 0.00       | 0.848   | 955   | 0.00         | 0.886   | 804  | 186.44                  | 0.576   | 843 |
|                                             | (0.03)   | [1.000] |       | (0.01)    | [1.000] |       | (0.78)         | [0.680] |       | (0.01)     | [1.000] |       | (0.02)       | [1.000] |      | (333.46)                | [1.000] |     |
| Risk Avers 118 (Titration Retire Savings)   | -0.02    | 0.412   | 808   | -0.02*    | 0.081   | 784   | -1.31*         | 0.099   | 806   | 0.01       | 0.457   | 801   | -0.01        | 0.580   | 738  | -400.74                 | 0.333   | 728 |
|                                             | (0.03)   | [0.960] |       | (0.01)    | [0.356] |       | (0.79)         | [0.417] |       | (0.01)     | [1.000] |       | (0.02)       | [1.000] |      | (413.93)                | [0.855] |     |
| Risk Avers 210 (MPL)                        | -0.02    | 0.349   | 1026  | -0.02     | 0.111   | 937   | -0.08          | 0.919   | 1018  | -0.00      | 0.690   | 956   | -0.00        | 0.998   | 841  | -411.81                 | 0.294   | 846 |
|                                             | (0.02)   | [0.882] |       | (0.01)    | [0.449] |       | (0.75)         | [1.000] |       | (0.01)     | [1.000] |       | (0.02)       | [1.000] |      | (392.18)                | [0.793] |     |
| Risk Avers SelfRate 133 (General)           | -0.14*** | 0.000   | 824   | -0.04***  | 0.000   | 798   | -3.64***       | 0.000   | 821   | 0.02*      | 0.067   | 815   | 0.02         | 0.243   | 748  | 235.08                  | 0.021   | 740 |
|                                             | (0.03)   | [0.001] |       | (0.01)    | [0.021] |       | (0.84)         | [0.011] |       | (0.01)     | [0.318] |       | (0.02)       | [0.725] |      | (475.21)                | [1.000] |     |
| Risk Avers SelfRate 197 (General)           | -0.14*** | 0.000   | 693   | -0.07***  | 0.000   | 682   | -3.71***       | 0.000   | 691   | -0.01      | 0.269   | 693   | 0.04**       | 0.030   | 645  | 418.58                  | 0.425   | 642 |
|                                             | (0.03)   | [0.001] |       | (0.01)    | [0.001] |       | (1.02)         | [0.008] |       | (0.01)     | [0.747] |       | (0.02)       | [0.192] |      | (524.18)                | [0.965] |     |
| Risk Avers SelfRate 12 (General)            | -0.12**  | 0.040   | 226   | -0.12**   | 0.000   | 226   | -3.39*         | 0.079   | 226   | 0.02       | 0.188   | 224   | -0.00        | 0.943   | 219  | -153.15                 | 0.874   | 212 |
|                                             | (0.06)   | [0.233] |       | (0.03)    | [0.001] |       | (1.92)         | [0.351] |       | (0.02)     | [0.645] |       | (0.04)       | [1.000] |      | (967.05)                | [1.000] |     |
| Risk Avers SelfRate 48 (General)            | -0.07**  | 0.030   | 612   | -0.04***  | 0.008   | 611   | -4.05***       | 0.000   | 609   | -0.01      | 0.521   | 604   | 0.03         | 0.124   | 589  | 1721.76*                | 0.002   | 561 |
|                                             | (0.03)   | [0.194] |       | (0.02)    | [0.074] |       | (0.94)         | [0.011] |       | (0.01)     | [1.000] |       | (0.02)       | [0.478] |      | (561.61)                | [0.031] |     |
| Risk Avers SelfRate 169 (General)           | -0.08*   | 0.085   | 295   | -0.03     | 0.149   | 295   | -2.58*         | 0.093   | 294   | 0.01       | 0.455   | 294   | 0.02         | 0.536   | 285  | -134.01                 | 0.865   | 276 |
|                                             | (0.05)   | [0.369] |       | (0.02)    | [0.548] |       | (1.53)         | [0.398] |       | (0.02)     | [1.000] |       | (0.03)       | [1.000] |      | (787.28)                | [1.000] |     |
| Risk Avers SelfRate 248 (General)           | -0.16*** | 0.000   | 747   | -0.08***  | 0.000   | 674   | -2.77***       | 0.006   | 745   | -0.01      | 0.621   | 747   | -0.02        | 0.334   | 596  | -123.99                 | 0.788   | 619 |
|                                             | (0.03)   | [0.001] |       | (0.01)    | [0.001] |       | (1.00)         | [0.058] |       | (0.01)     | [1.000] |       | (0.02)       | [0.855] |      | (461.93)                | [1.000] |     |
| Risk Avers SelfRate 189 (General)           | -0.14*** | 0.000   | 928   | -0.04***  | 0.001   | 870   | -2.89***       | 0.001   | 926   | 0.01       | 0.536   | 902   | 0.03*        | 0.057   | 797  | 873.74**                | 0.042   | 809 |
|                                             | (0.03)   | [0.001] |       | (0.01)    | [0.015] |       | (0.83)         | [0.011] |       | (0.01)     | [1.000] |       | (0.02)       | [0.289] |      | (429.43)                | [0.241] |     |
| Risk Avers SelfRate 349 (Financial)         | -0.10*** | 0.000   | 1139  | -0.03***  | 0.001   | 952   | -2.46***       | 0.002   | 1121  | 0.00       | 0.714   | 975   | 0.01         | 0.398   | 782  | 492.77                  | 0.140   | 838 |
|                                             | (0.03)   | [0.009] |       | (0.01)    | [0.021] |       | (0.78)         | [0.025] |       | (0.01)     | [1.000] |       | (0.02)       | [0.934] |      | (333.54)                | [0.529] |     |
| Risk Avers SelfRate 342 (Financial)         | -0.12*** | 0.007   | 523   | -0.05***  | 0.002   | 446   | -3.64***       | 0.004   | 522   | -0.00      | 0.716   | 479   | 0.02         | 0.469   | 398  | -208.24                 | 0.737   | 413 |
|                                             | (0.04)   | [0.065] |       | (0.02)    | [0.024] |       | (1.26)         | [0.043] |       | (0.01)     | [1.000] |       | (0.03)       | [1.000] |      | (619.18)                | [1.000] |     |
| Risk Avers SelfRate 197 (Financial)         | -0.15*** | 0.000   | 693   | -0.08***  | 0.000   | 682   | -4.68***       | 0.000   | 691   | -0.01      | 0.563   | 693   | 0.00         | 0.995   | 645  | 82.10                   | 0.877   | 642 |
|                                             | (0.03)   | [0.001] |       | (0.01)    | [0.001] |       | (0.99)         | [0.001] |       | (0.01)     | [0.897] |       | (0.02)       | [1.000] |      | (532.34)                | [1.000] |     |
| Risk Avers SelfRate 193 (Financial)         | -0.16*** | 0.000   | 436   | -0.07***  | 0.001   | 435   | -2.59**        | 0.031   | 436   | -0.01      | 0.288   | 433   | -0.03        | 0.246   | 427  | 442.78                  | 0.514   | 414 |
|                                             | (0.04)   | [0.001] |       | (0.02)    | [0.022] |       | (1.20)         | [0.197] |       | (0.01)     | [0.787] |       | (0.03)       | [0.728] |      | (678.53)                | [1.000] |     |
| Risk Avers SelfRate 342 (Financial)         | -0.08*   | 0.007   | 522   | -0.06***  | 0.002   | 445   | -2.67**        | 0.004   | 521   | 0.01       | 0.716   | 478   | -0.01        | 0.699   | 397  | 168.49                  | 0.737   | 412 |
|                                             | (0.04)   | [0.065] |       | (0.02)    | [0.024] |       | (1.31)         | [0.043] |       | (0.01)     | [1.000] |       | (0.03)       | [1.000] |      | (572.74)                | [1.000] |     |
| Risk Avers SelfRate 130 (Financial)         | -0.06    | 0.232   | 298   | -0.07***  | 0.001   | 298   | -2.94**        | 0.045   | 297   | -0.01      | 0.685   | 298   | -0.00        | 0.993   | 287  | 1125.99                 | 0.135   | 279 |
|                                             | (0.04)   | [0.733] |       | (0.02)    | [0.012] |       | (1.46)         | [0.251] |       | (0.02)     | [1.000] |       | (0.03)       | [1.000] |      | (749.87)                | [0.512] |     |
| Risk Avers SelfRate 260 (Financial)         | -0.11*** | 0.001   | 584   | -0.09***  | 0.000   | 584   | -4.93***       | 0.000   | 583   | -0.01      | 0.386   | 580   | -0.01        | 0.559   | 565  | -3.98                   | 0.995   | 552 |
|                                             | (0.03)   | [0.014] |       | (0.02)    | [0.001] |       | (1.05)         | [0.001] |       | (0.01)     | [0.921] |       | (0.02)       | [1.000] |      | (574.67)                | [1.000] |     |
| Risk Avers SelfRate 167 (Financial)         | -0.03    | 0.501   | 290   | -0.06**   | 0.015   | 290   | -1.53          | 0.289   | 290   | -0.02      | 0.219   | 290   | 0.01         | 0.746   | 281  | 439.21                  | 0.557   | 273 |
|                                             | (0.04)   | [1.000] |       | (0.02)    | [0.118] |       | (1.44)         | [0.787] |       | (0.02)     | [0.845] |       | (0.03)       | [1.000] |      | (746.81)                | [1.000] |     |
| Risk Avers SelfRate 179 (Financial)         | -0.02    | 0.392   | 893   | -0.02     | 0.172   | 845   | -0.88          | 0.294   | 891   | -0.00      | 0.654   | 878   | 0.04**       | 0.015   | 782  | 1023.21**               | 0.016   | 783 |
|                                             | (0.03)   | [0.930] |       | (0.01)    | [0.590] |       | (0.84)         | [0.793] |       | (0.01)     | [1.000] |       | (0.02)       | [1.113] |      | (424.41)                | [0.122] |     |
| Risk Avers SelfRate 130 (Daily Act)         | -0.08*   | 0.094   | 298   | -0.04*    | 0.099   | 298   | -4.55***       | 0.002   | 297   | -0.00      | 0.982   | 298   | 0.04         | 0.167   | 287  | 1233.76                 | 0.169   | 279 |
|                                             | (0.05)   | [0.401] |       | (0.02)    | [0.417] |       | (1.45)         | [0.027] |       | (0.02)     | [1.000] |       | (0.03)       | [0.578] |      | (813.75)                | [0.580] |     |
| Risk Avers SelfRate 260 (Daily Act)         | -0.11*** | 0.001   | 584   | -0.04**   | 0.019   | 584   | -3.74***       | 0.000   | 583   | 0.00       | 0.941   | 580   | 0.01         | 0.706   | 565  | 214.75                  | 0.703   | 552 |
|                                             | (0.03)   | [0.021] |       | (0.02)    | [0.136] |       | (0.98)         | [0.006] |       | (0.01)     | [1.000] |       | (0.02)       | [1.000] |      | (562.00)                | [1.000] |     |
| Risk Avers SelfRate 167 (Daily Act)         | -0.05    | 0.297   | 290   | -0.04*    | 0.065   | 290   | -0.83          | 0.551   | 290   | 0.02       | 0.196   | 290   | 0.04         | 0.166   | 281  | 1337.65*                | 0.057   | 273 |
|                                             | (0.05)   | [0.799] |       | (0.02)    | [0.310] |       | (1.39)         | [1.000] |       | (0.02)     | [0.653] |       | (0.03)       | [0.578] |      | (803.86)                | [0.289] |     |
| Risk Avers SelfRate 197 (Driving)           | -0.01    | 0.871   | 693   | -0.03**   | 0.036   | 682   | -0.07          | 0.942   | 691   | 0.01       | 0.290   | 693   | 0.00         | 0.919   | 645  | 536.72                  | 0.248   | 642 |
|                                             | (0.03)   | [1.000] |       | (0.01)    | [0.222] |       | (0.93)         | [1.000] |       | (0.01)     | [0.845] |       | (0.02)       | [1.000] |      | (464.41)                | [0.729] |     |
| Risk Avers SelfRate 197 (Occupation)        | -0.06**  | 0.036   | 693   | -0.04**   | 0.016   | 682   | -2.37**        | 0.015   | 691   | 0.01       | 0.359   | 693   | -0.03        | 0.179   | 645  | 145.21                  | 0.773   | 642 |
|                                             | (0.03)   | [0.222] |       | (0.01)    | [0.120] |       | (0.97)         | [1.118] |       | (0.01)     | [0.892] |       | (0.02)       | [0.613] |      | (504.40)                | [1.000] |     |

Table C.2: Financial and Health Outcomes Regressed on All Standardized Values of Risk Preference (Continued)

|                                                  | Has Retirement Savings | Pay Bill Full    | Paycheck to Paycheck | Retirement Savings | Alcohol          | Moderate Exercise Time |                   |                  |                     |                             |                   |                  |                  |                |                  |
|--------------------------------------------------|------------------------|------------------|----------------------|--------------------|------------------|------------------------|-------------------|------------------|---------------------|-----------------------------|-------------------|------------------|------------------|----------------|------------------|
| Risk Avers 167 (Titration Hypothetical Job)      | 0.05*<br>(0.03)        | 0.067<br>(0.318) | 232<br>(1.000)       | 0.01<br>(0.05)     | 0.842<br>(1.000) | 166<br>(0.653)         | -0.25<br>(0.19)   | 0.495<br>(0.733) | 69<br>(7808.55)     | -8921.06<br>(7808.55)       | 263<br>(0.733)    | -0.02<br>(0.05)  | 0.670<br>(1.000) | 288<br>(0.13)  | 0.436<br>(0.965) |
| Risk Avers 197 (Titration Hypothetical Job)      | -0.01<br>(0.02)        | 0.752<br>(1.000) | 576<br>(1.000)       | 0.01<br>(0.04)     | 0.864<br>(1.000) | 395<br>(1.000)         | -0.05<br>(0.10)   | 0.585<br>(0.636) | 182<br>(4891.73)    | -6479.93<br>(4891.73)       | 641<br>(0.636)    | 0.01<br>(0.03)   | 0.714<br>(1.000) | 689<br>(0.810) | 0.304<br>(0.810) |
| Risk Avers 197 (Titration Alternative Job)       | -0.01<br>(0.02)        | 0.506<br>(1.000) | 576<br>(1.000)       | -0.04<br>(0.03)    | 0.227<br>(0.687) | 395<br>(1.000)         | 0.02<br>(0.11)    | 0.819<br>(1.000) | 182<br>(4981.04)    | -14324.59**<br>(4981.04)    | 641<br>(0.645)    | -0.01<br>(0.03)  | 0.817<br>(1.000) | 689<br>(0.08)  | 0.475<br>(1.000) |
| Risk Avers 197 (Titration Insurance)             | 0.00<br>(0.02)         | 0.897<br>(1.000) | 576<br>(1.000)       | -0.01<br>(0.03)    | 0.773<br>(1.000) | 395<br>(1.000)         | -0.13<br>(0.11)   | 0.250<br>(0.733) | 182<br>(3859.52)    | 3359.52<br>(3859.52)        | 641<br>(1.000)    | -0.03<br>(0.03)  | 0.266<br>(0.742) | 689<br>(0.08)  | 0.258<br>(0.733) |
| Risk Avers 50 (Titration Inheritance)            | -0.03*<br>(0.02)       | 0.093<br>(0.398) | 489<br>(1.000)       | -0.02<br>(0.03)    | 0.510<br>(1.000) | 349<br>(1.000)         | 0.03<br>(0.12)    | 0.841<br>(1.000) | 150<br>(705.17)     | 705.17<br>(5965.29)         | 567<br>(1.000)    | -0.01<br>(0.04)  | 0.744<br>(1.000) | 602<br>(0.09)  | 0.255<br>(0.733) |
| Risk Avers 189 (Titration Inheritance)           | -0.03*<br>(0.02)       | 0.063<br>(0.302) | 766<br>(1.000)       | 0.02<br>(0.03)     | 0.602<br>(1.000) | 477<br>(1.000)         | 0.02<br>(0.07)    | 0.759<br>(1.000) | 286<br>(3988.96)    | -7982.33**<br>(3988.96)     | 864<br>(0.253)    | 0.04<br>(0.03)   | 0.210<br>(0.678) | 787<br>(0.08)  | 0.469<br>(1.000) |
| Risk Avers 399 (Eckel & Grossman)                | 0.568<br>(0.01)        | 0.000<br>(1.000) | 1088<br>(1.000)      | 0.01<br>(0.02)     | 0.403<br>(0.943) | 571<br>(1.000)         | 0.02<br>(0.06)    | 0.633<br>(1.000) | 150<br>(2319.02)    | 150<br>(2319.02)            | 771<br>(1.000)    | 0.03<br>(0.03)   | 0.959<br>(1.000) | 771<br>(0.07)  | 0.819<br>(1.000) |
| Risk Avers 263 (Eckel & Grossman)                | 0.769<br>(0.03)        | 2.46<br>(1.000)  | -0.01<br>(0.08)      | 0.967<br>(1.000)   | 110<br>(1.000)   | -0.00<br>(0.07)        | 0.716<br>(1.000)  | 339<br>(3334.50) | -0.03<br>(3334.50)  | 339<br>(7.66)               | 3607.48<br>(7.66) | -0.06<br>(0.10)  | 0.550<br>(1.000) | 135<br>(0.19)  | 0.505<br>(1.000) |
| Risk Avers 243 (Titration Ball)                  | 0.03**<br>(0.01)       | 0.047<br>(0.257) | 1018<br>(1.000)      | 0.02<br>(0.03)     | 0.419<br>(0.965) | 431<br>(1.000)         | -0.09<br>(0.06)   | 0.159<br>(0.523) | 385<br>(3333.67)    | -558.25<br>(3333.67)        | 994<br>(1.000)    | -0.02<br>(0.03)  | 0.507<br>(1.000) | 666<br>(0.08)  | 0.154<br>(0.560) |
| Risk Avers 118 (Titration Retire Savings)        | 0.00<br>(0.02)         | 0.985<br>(1.000) | 662<br>(1.000)       | 0.01<br>(0.03)     | 0.578<br>(1.000) | 441<br>(1.000)         | -0.12<br>(0.08)   | 0.153<br>(0.560) | 216<br>(4283.92)    | -2679.69<br>(4283.92)       | 752<br>(1.000)    | 0.02<br>(0.03)   | 0.491<br>(1.000) | 805<br>(0.07)  | 0.949<br>(1.000) |
| Risk Avers 210 (MPL)                             | 0.00<br>(0.02)         | 0.808<br>(1.000) | 818<br>(1.000)       | -0.01<br>(0.03)    | 0.706<br>(1.000) | 493<br>(1.000)         | -0.02<br>(0.08)   | 0.797<br>(1.000) | 331<br>(5692.44)    | -5692.44<br>(5692.44)       | 965<br>(0.459)    | -0.01<br>(0.03)  | 0.694<br>(1.000) | 787<br>(0.07)  | 0.945<br>(1.000) |
| Risk Avers SelfRate 133 (General)                | -0.02<br>(0.02)        | 0.298<br>(0.675) | 674<br>(1.000)       | 0.01<br>(0.03)     | 0.753<br>(1.000) | 447<br>(1.000)         | 0.10<br>(0.09)    | 0.288<br>(0.787) | 225<br>(11084.32**) | -11084.32**<br>(11084.32**) | 767<br>(1.000)    | 0.01<br>(0.04)   | 0.685<br>(1.000) | 824<br>(0.07)  | 0.097<br>(0.222) |
| Risk Avers SelfRate 197 (General)                | -0.02<br>(0.02)        | 0.310<br>(0.832) | 576<br>(1.000)       | 0.01<br>(0.03)     | 0.696<br>(1.000) | 395<br>(1.000)         | -0.10<br>(0.13)   | 0.416<br>(0.726) | 183<br>(5707.15)    | -14262.45**<br>(5707.15)    | 642<br>(1.000)    | -0.04<br>(0.04)  | 0.201<br>(0.333) | 690<br>(0.09)  | 0.001<br>(1.000) |
| Risk Avers SelfRate 12 (General)                 | 0.05<br>(0.03)         | 0.146<br>(0.543) | 182<br>(1.000)       | -0.10<br>(0.06)    | 0.072<br>(0.329) | 132<br>(1.000)         | 0.11<br>(0.37)    | 0.762<br>(1.000) | 52<br>(10276.02)    | -7631.10<br>(10276.02)      | 207<br>(0.965)    | -0.07<br>(0.06)  | 0.238<br>(0.710) | 221<br>(0.15)  | 0.716<br>(1.000) |
| Risk Avers SelfRate 48 (General)                 | -0.02<br>(0.02)        | 0.315<br>(0.832) | 484<br>(1.000)       | 0.03<br>(0.03)     | 0.257<br>(0.733) | 347<br>(1.000)         | -0.15<br>(0.13)   | 0.244<br>(0.726) | 150<br>(5707.15)    | -4333.41<br>(5707.15)       | 560<br>(1.000)    | -0.06*<br>(0.04) | 0.074<br>(0.333) | 595<br>(0.09)  | 0.604<br>(1.000) |
| Risk Avers SelfRate 169 (General)                | 0.03<br>(0.03)         | 0.394<br>(0.855) | 234<br>(1.000)       | 0.06<br>(0.04)     | 0.196<br>(0.653) | 165<br>(1.000)         | -0.15<br>(0.20)   | 0.458<br>(1.000) | 72<br>(8000.49)     | -6434.28<br>(8000.49)       | 271<br>(0.965)    | -0.01<br>(0.06)  | 0.921<br>(1.000) | 295<br>(0.13)  | 0.248<br>(0.729) |
| Risk Avers SelfRate 248 (General)                | -0.05**<br>(0.02)      | 0.014<br>(0.112) | 594<br>(1.000)       | -0.01<br>(0.04)    | 0.762<br>(1.000) | 319<br>(1.000)         | 0.13<br>(0.08)    | 0.116<br>(0.451) | 295<br>(4288.76)    | -19309.64**<br>(4288.76)    | 704<br>(0.001)    | -0.08<br>(0.05)  | 0.101<br>(0.424) | 444<br>(0.11)  | 0.268<br>(0.747) |
| Risk Avers SelfRate 189 (General)                | -0.02<br>(0.02)        | 0.328<br>(0.860) | 770<br>(1.000)       | 0.03<br>(0.03)     | 0.316<br>(0.834) | 480<br>(1.000)         | -0.09<br>(0.09)   | 0.292<br>(0.793) | 289<br>(4405.01)    | -8565.42*<br>(4405.01)      | 869<br>(0.277)    | -0.00<br>(0.03)  | 0.941<br>(1.000) | 793<br>(0.08)  | 0.092<br>(0.153) |
| Risk Avers SelfRate 349 (Financial)              | 0.00<br>(0.01)         | 0.812<br>(1.000) | 954<br>(1.000)       | 0.02<br>(0.03)     | 0.601<br>(1.000) | 349<br>(1.000)         | -0.01<br>(0.11)   | 0.812<br>(1.000) | 442<br>(5277.57)    | -2020.20**<br>(5277.57)     | 1111<br>(0.001)   | -0.04<br>(0.04)  | 0.287<br>(0.787) | 577<br>(0.09)  | 0.417<br>(0.965) |
| Risk Avers SelfRate 342 (Financial)              | -0.03<br>(0.02)        | 0.278<br>(0.763) | 431<br>(1.000)       | 0.03<br>(0.05)     | 0.466<br>(1.000) | 244<br>(1.000)         | 0.02<br>(0.11)    | 0.875<br>(1.000) | 187<br>(5933.22)    | -15305.79**<br>(5933.22)    | 506<br>(0.900)    | 0.03<br>(0.05)   | 0.550<br>(1.000) | 298<br>(0.15)  | 0.062<br>(0.301) |
| Risk Avers SelfRate 197 (Financial)              | -0.01<br>(0.02)        | 0.462<br>(1.000) | 576<br>(1.000)       | -0.00<br>(0.03)    | 0.869<br>(1.000) | 395<br>(1.000)         | 0.05<br>(0.11)    | 0.685<br>(1.000) | 183<br>(26550.01**) | -26550.01**<br>(26550.01**) | 642<br>(0.009)    | -0.03<br>(0.04)  | 0.459<br>(1.000) | 690<br>(0.09)  | 0.251<br>(0.733) |
| Risk Avers SelfRate 193 (Financial)              | -0.01<br>(0.02)        | 0.544<br>(1.000) | 336<br>(1.000)       | 0.00<br>(0.04)     | 0.971<br>(1.000) | 281<br>(1.000)         | -0.03<br>(0.20)   | 0.869<br>(1.000) | 99<br>(8930.83)     | -8930.83<br>(8930.83)       | 397<br>(0.733)    | -0.02<br>(0.04)  | 0.688<br>(1.000) | 428<br>(0.11)  | 0.099<br>(0.417) |
| Risk Avers SelfRate 342 (Financial)              | -0.03<br>(0.02)        | 0.278<br>(0.763) | 430<br>(1.000)       | -0.07<br>(0.05)    | 0.466<br>(1.000) | 243<br>(1.000)         | -0.01<br>(0.11)   | 0.875<br>(1.000) | 187<br>(5433.14)    | -10802.84**<br>(5433.14)    | 505<br>(0.900)    | 0.02<br>(0.05)   | 0.550<br>(1.000) | 297<br>(0.16)  | 0.062<br>(0.301) |
| Risk Avers SelfRate 130 (Financial)              | -0.06**<br>(0.03)      | 0.045<br>(0.253) | 238<br>(1.000)       | 0.04<br>(0.04)     | 0.376<br>(0.905) | 167<br>(1.000)         | 0.25<br>(0.19)    | 0.198<br>(0.660) | 71<br>(8257.46)     | -14803.46*<br>(8257.46)     | 273<br>(0.333)    | 0.01<br>(0.05)   | 0.907<br>(1.000) | 298<br>(0.12)  | 0.648<br>(1.000) |
| Risk Avers SelfRate 260 (Financial)              | -0.02<br>(0.02)        | 0.510<br>(1.000) | 478<br>(1.000)       | -0.03<br>(0.03)    | 0.295<br>(0.793) | 343<br>(1.000)         | -0.02<br>(0.12)   | 0.883<br>(1.000) | 142<br>(5808.74)    | -20258.01**<br>(5808.74)    | 538<br>(0.011)    | -0.01<br>(0.04)  | 0.884<br>(1.000) | 578<br>(0.09)  | 0.213<br>(0.680) |
| Risk Avers SelfRate 167 (Financial)              | -0.06*<br>(0.03)       | 0.070<br>(0.323) | 234<br>(1.000)       | 0.03<br>(0.05)     | 0.545<br>(1.000) | 166<br>(1.000)         | 0.02<br>(0.20)    | 0.903<br>(1.000) | 69<br>(8386.22)     | -12914.57<br>(8386.22)      | 265<br>(0.479)    | 0.01<br>(0.06)   | 0.818<br>(1.000) | 290<br>(0.12)  | 0.215<br>(0.680) |
| Risk Avers SelfRate 179 (Financial)              | -0.06***<br>(0.02)     | 0.000<br>(0.009) | 742<br>(1.000)       | 0.04<br>(0.03)     | 0.173<br>(0.594) | 471<br>(1.000)         | -0.17**<br>(0.07) | 0.023<br>(0.156) | 270<br>(4182.22)    | -6299.51<br>(4182.22)       | 836<br>(0.508)    | 0.01<br>(0.03)   | 0.652<br>(1.000) | 802<br>(0.08)  | 0.073<br>(0.332) |
| Risk Avers SelfRate 130 (Daily Act)              | -0.03<br>(0.03)        | 0.427<br>(0.965) | 288<br>(1.000)       | 0.04<br>(0.05)     | 0.369<br>(0.897) | 167<br>(1.000)         | -0.24<br>(0.21)   | 0.259<br>(0.733) | 71<br>(8333.25)     | 7468.95<br>(8333.25)        | 273<br>(0.901)    | 0.03<br>(0.05)   | 0.535<br>(1.000) | 298<br>(0.12)  | 0.748<br>(1.000) |
| Risk Avers SelfRate 260 (Daily Act)              | -0.03<br>(0.02)        | 0.183<br>(0.628) | 478<br>(1.000)       | 0.01<br>(0.03)     | 0.683<br>(1.000) | 343<br>(1.000)         | 0.13<br>(0.13)    | 0.350<br>(0.882) | 142<br>(5896.51)    | -5896.51<br>(5896.51)       | 538<br>(0.845)    | 0.01<br>(0.04)   | 0.728<br>(1.000) | 578<br>(0.09)  | 0.386<br>(0.921) |
| Risk Avers SelfRate 167 (Daily Act)              | -0.03<br>(0.03)        | 0.397<br>(0.934) | 234<br>(1.000)       | 0.07<br>(0.05)     | 0.292<br>(0.663) | 166<br>(1.000)         | -0.16<br>(0.19)   | 0.407<br>(0.951) | 69<br>(7690.24)     | -3238.85<br>(7690.24)       | 265<br>(1.000)    | 0.01<br>(0.05)   | 0.823<br>(1.000) | 290<br>(0.12)  | 0.216<br>(0.680) |
| Risk Avers SelfRate 197 (Driving)                | -0.03<br>(0.02)        | 0.155<br>(0.564) | 576<br>(1.000)       | 0.04<br>(0.03)     | 0.215<br>(0.680) | 395<br>(1.000)         | -0.17<br>(0.12)   | 0.162<br>(0.578) | 183<br>(4775.79)    | -4817.23<br>(4775.79)       | 642<br>(0.830)    | 0.03<br>(0.05)   | 0.362<br>(0.897) | 690<br>(0.08)  | 0.184<br>(0.631) |
| Risk Avers SelfRate 197 (Occupation)             | 0.02<br>(0.02)         | 0.200<br>(0.662) | 576<br>(1.000)       | -0.00<br>(0.03)    | 0.882<br>(1.000) | 395<br>(1.000)         | -0.16<br>(0.10)   | 0.126<br>(0.481) | 183<br>(13397.74**) | -13397.74**<br>(13397.74**) | 642<br>(0.888)    | -0.03<br>(0.03)  | 0.107<br>(0.445) | 690<br>(0.08)  | 0.130<br>(0.500) |
| Risk Avers SelfRate 197 (Health)                 | -0.00<br>(0.02)        | 0.840<br>(1.000) | 575<br>(1.000)       | 0.06**<br>(0.03)   | 0.049<br>(0.265) | 395<br>(1.000)         | -0.12<br>(0.12)   | 0.302<br>(0.810) | 183<br>(4774.78)    | 4774.78<br>(4774.78)        | 641<br>(1.000)    | -0.01<br>(0.03)  | 0.657<br>(1.000) | 689<br>(0.08)  | 0.353<br>(0.887) |
| Risk Avers SelfRate 197 (Social Relation)        | 0.01<br>(0.02)         | 0.687<br>(1.000) | 576<br>(1.000)       | 0.00<br>(0.03)     | 0.927<br>(1.000) | 395<br>(1.000)         | -0.12<br>(0.12)   | 0.304<br>(0.810) | 183<br>(5096.98)    | -5096.98<br>(5096.98)       | 642<br>(0.687)    | -0.04<br>(0.03)  | 0.232<br>(0.692) | 690<br>(0.08)  | 0.193<br>(0.653) |
| Risk Avers SelfRate 197 (Life Change)            | -0.00<br>(0.02)        | 0.975<br>(1.000) | 576<br>(1.000)       | 0.00<br>(0.03)     | 0.932<br>(1.000) | 395<br>(1.000)         | -0.21*<br>(0.11)  | 0.053<br>(0.280) | 183<br>(4880.55)    | -6380.53<br>(4880.55)       | 642<br>(0.653)    | -0.06*<br>(0.03) | 0.054<br>(0.280) | 690<br>(0.07)  | 0.009<br>(0.089) |
| Risk Avers SelfRate 179 (Safe Invest Importance) | -0.08***<br>(0.02)     | 0.000<br>(0.001) | 741<br>(1.000)       | 0.05*<br>(0.03)    | 0.065<br>(0.309) | 471<br>(1.000)         | -0.08<br>(0.08)   | 0.327<br>(0.855) | 270<br>(4433.64)    | -10347.79**<br>(4433.64)    | 835<br>(0.137)    | -0.00<br>(0.04)  | 0.953<br>(1.000) | 801<br>(0.08)  | 0.240<br>(0.715) |

Notes: OLS with robust standard errors. Controls include cognitive ability, financial literacy, risk aversion, 17 income categories, 6 age categories, indicator variable for female, 16 education categories, and 5 race categories. \* Significant at the 10% level; \*\* at the 5% level; \*\*\* at the 1% level. Naive p-values are reported in italics, FDR adjusted  $\alpha$ -values are reported in brackets. The third column in each cell reports  $N$ .

Table C.2: Financial and Health Outcomes Regressed on All Standardized Values of Risk Preference (Continued)

|                                                  | Fruit Vege         | Cereal Fiber     | Go to Doctor Routinely | Low dose of Aspirin | Smoking          | Payday Loan      | Medical Insurance |
|--------------------------------------------------|--------------------|------------------|------------------------|---------------------|------------------|------------------|-------------------|
| Risk Avers 167 (Titration Hypothetical Job)      | -0.07<br>(0.08)    | 0.402<br>(0.943) | 288<br>(1.000)         | 0.751<br>(1.000)    | 288<br>(1.000)   | 0.961<br>(1.000) | 0.084<br>(0.02)   |
| Risk Avers 197 (Titration Hypothetical Job)      | -0.13**<br>(0.05)  | 0.013<br>(0.295) | 689<br>(0.241)         | 0.220<br>(0.680)    | 0.961<br>(1.000) | 0.572<br>(0.03)  | 0.124<br>(0.01)   |
| Risk Avers 197 (Titration Alternative Job)       | -0.07<br>(0.06)    | 0.229<br>(0.687) | 689<br>(1.000)         | 0.176<br>(0.763)    | 0.832<br>(1.000) | 0.944<br>(0.03)  | 0.478<br>(0.01)   |
| Risk Avers 197 (Titration Insurance)             | 0.05<br>(0.06)     | 0.369<br>(0.897) | 689<br>(1.000)         | 0.727<br>(1.000)    | 0.897<br>(1.000) | 0.629<br>(0.03)  | 0.629<br>(0.01)   |
| Risk Avers 50 (Titration Inheritance)            | -0.08<br>(0.06)    | 0.214<br>(0.680) | 602<br>(1.000)         | 0.829<br>(1.000)    | 0.614<br>(1.000) | 0.516<br>(0.02)  | 0.516<br>(0.01)   |
| Risk Avers 189 (Titration Inheritance)           | -0.07<br>(0.06)    | 0.210<br>(0.715) | 786<br>(0.318)         | 0.668<br>(0.318)    | 0.787<br>(1.000) | 0.682<br>(0.03)  | 0.682<br>(0.01)   |
| Risk Avers 399 (Eckel & Grossman)                | 0.519<br>(0.05)    | 0.770<br>(1.000) | 0.07<br>(0.613)        | 0.825<br>(1.000)    | 0.771<br>(1.000) | 0.478<br>(0.02)  | 1.122<br>(0.01)   |
| Risk Avers 263 (Eckel & Grossman)                | 0.151<br>(0.13)    | 0.135<br>(0.555) | 0.13<br>(0.829)        | 0.634<br>(1.000)    | 0.594<br>(1.000) | 0.538<br>(0.05)  | 0.249<br>(0.03)   |
| Risk Avers 243 (Titration Ball)                  | -0.00<br>(0.05)    | 0.976<br>(1.000) | 666<br>(1.000)         | 0.693<br>(1.000)    | 0.666<br>(1.000) | 0.765<br>(0.01)  | 0.765<br>(0.01)   |
| Risk Avers 118 (Titration Retire Savings)        | -0.06<br>(0.05)    | 0.228<br>(0.687) | 804<br>(1.000)         | 0.452<br>(1.000)    | 0.805<br>(1.000) | 0.366<br>(0.03)  | 0.469<br>(0.01)   |
| Risk Avers 210 (MPL)                             | -0.00<br>(0.05)    | 0.983<br>(1.000) | 787<br>(0.175)         | 0.787<br>(0.601)    | 0.787<br>(1.000) | 0.109<br>(0.01)  | 0.109<br>(0.01)   |
| Risk Avers SelfRate 133 (General)                | -0.10*<br>(0.05)   | 0.052<br>(0.277) | 824<br>(0.241)         | 0.785<br>(1.000)    | 0.419<br>(0.733) | 0.597<br>(0.03)  | 0.597<br>(0.01)   |
| Risk Avers SelfRate 197 (General)                | -0.11**<br>(0.06)  | 0.464<br>(0.687) | 297<br>(0.733)         | 0.003<br>(0.901)    | 0.287<br>(1.000) | 0.642<br>(0.03)  | 0.642<br>(0.01)   |
| Risk Avers SelfRate 12 (General)                 | -0.16<br>(0.11)    | 0.176<br>(0.601) | 221<br>(0.855)         | 0.036<br>(0.222)    | 0.258<br>(0.733) | 0.894<br>(0.03)  | 0.894<br>(0.01)   |
| Risk Avers SelfRate 48 (General)                 | 0.03<br>(0.06)     | 0.637<br>(1.000) | 594<br>(1.000)         | 0.243<br>(0.725)    | 0.595<br>(1.000) | 0.999<br>(0.02)  | 0.999<br>(0.01)   |
| Risk Avers SelfRate 169 (General)                | -0.12<br>(0.09)    | 0.212<br>(0.680) | 295<br>(0.680)         | 0.216<br>(0.680)    | 0.295<br>(1.000) | 0.121<br>(0.03)  | 0.121<br>(0.01)   |
| Risk Avers SelfRate 248 (General)                | -0.09<br>(0.08)    | 0.256<br>(0.733) | 444<br>(0.733)         | 0.010<br>(0.090)    | 0.444<br>(0.999) | 0.998<br>(0.02)  | 0.998<br>(0.01)   |
| Risk Avers SelfRate 189 (General)                | -0.02<br>(0.05)    | 0.619<br>(1.000) | 792<br>(1.000)         | 0.569<br>(1.000)    | 0.793<br>(1.000) | 0.529<br>(0.02)  | 0.529<br>(0.01)   |
| Risk Avers SelfRate 349 (Financial)              | -0.11*<br>(0.06)   | 0.070<br>(0.323) | 689<br>(0.323)         | 0.052<br>(0.049)    | 0.095<br>(0.333) | 0.641<br>(0.02)  | 0.641<br>(0.01)   |
| Risk Avers SelfRate 193 (Financial)              | -0.06<br>(0.08)    | 0.425<br>(0.965) | 427<br>(0.653)         | 0.220<br>(0.680)    | 0.428<br>(1.000) | 0.999<br>(0.02)  | 0.999<br>(0.01)   |
| Risk Avers SelfRate 342 (Financial)              | 0.10<br>(0.09)     | 0.464<br>(1.000) | 296<br>(1.000)         | 0.003<br>(0.034)    | 0.297<br>(0.034) | 0.141<br>(0.02)  | 0.141<br>(0.01)   |
| Risk Avers SelfRate 130 (Financial)              | -0.08<br>(0.09)    | 0.399<br>(0.935) | 298<br>(0.935)         | 0.474<br>(1.000)    | 0.298<br>(1.000) | 0.824<br>(0.02)  | 0.824<br>(0.01)   |
| Risk Avers SelfRate 260 (Financial)              | 0.01<br>(0.07)     | 0.838<br>(1.000) | 577<br>(1.000)         | 0.036<br>(0.222)    | 0.578<br>(0.888) | 0.036<br>(0.02)  | 0.036<br>(0.01)   |
| Risk Avers SelfRate 167 (Financial)              | -0.08<br>(0.09)    | 0.398<br>(0.934) | 290<br>(0.934)         | 0.880<br>(1.000)    | 0.290<br>(1.000) | 0.414<br>(0.02)  | 0.414<br>(0.01)   |
| Risk Avers SelfRate 179 (Financial)              | 0.02<br>(0.05)     | 0.748<br>(1.000) | 801<br>(1.000)         | 0.358<br>(0.892)    | 0.802<br>(0.933) | 0.260<br>(0.01)  | 0.260<br>(0.01)   |
| Risk Avers SelfRate 130 (Daily Act)              | -0.18*<br>(0.09)   | 0.056<br>(0.286) | 298<br>(0.860)         | 0.377<br>(1.000)    | 0.298<br>(1.000) | 0.832<br>(0.03)  | 0.832<br>(0.01)   |
| Risk Avers SelfRate 260 (Daily Act)              | -0.07<br>(0.06)    | 0.265<br>(0.737) | 577<br>(0.818)         | 0.136<br>(0.516)    | 0.578<br>(1.000) | 0.093<br>(0.02)  | 0.093<br>(0.01)   |
| Risk Avers SelfRate 167 (Daily Act)              | -0.05<br>(0.09)    | 0.582<br>(1.000) | 290<br>(0.855)         | 0.334<br>(0.855)    | 0.290<br>(1.000) | 0.678<br>(0.03)  | 0.678<br>(0.01)   |
| Risk Avers SelfRate 197 (Driving)                | -0.03<br>(0.06)    | 0.532<br>(1.000) | 689<br>(1.000)         | 0.026<br>(0.175)    | 0.690<br>(1.000) | 0.199<br>(0.01)  | 0.199<br>(0.01)   |
| Risk Avers SelfRate 197 (Occupation)             | -0.16***<br>(0.06) | 0.065<br>(0.050) | 689<br>(0.050)         | 0.307<br>(0.855)    | 0.690<br>(0.855) | 0.965<br>(0.02)  | 0.965<br>(0.01)   |
| Risk Avers SelfRate 197 (Health)                 | 0.00<br>(0.06)     | 0.922<br>(1.000) | 689<br>(0.860)         | 0.070<br>(0.352)    | 0.689<br>(1.000) | 0.013<br>(0.03)  | 0.013<br>(0.01)   |
| Risk Avers SelfRate 197 (Social Relation)        | -0.14***<br>(0.05) | 0.010<br>(0.090) | 689<br>(0.512)         | 0.479<br>(1.000)    | 0.690<br>(0.787) | 0.254<br>(0.01)  | 0.254<br>(0.01)   |
| Risk Avers SelfRate 197 (Life Change)            | -0.21***<br>(0.06) | 0.000<br>(0.006) | 689<br>(0.470)         | 0.700<br>(1.000)    | 0.690<br>(0.860) | 0.786<br>(0.01)  | 0.786<br>(0.01)   |
| Risk Avers SelfRate 179 (Safe Invest Importance) | -0.07<br>(0.05)    | 0.219<br>(0.680) | 801<br>(0.305)         | 0.064<br>(0.305)    | 0.801<br>(1.000) | 0.558<br>(0.03)  | 0.558<br>(0.01)   |

Notes: OLS with robust standard errors. Controls include cognitive ability, financial literacy, risk aversion, 17 income categories, 6 age categories, indicator variable for female, 16 education categories, and 5 race categories. \* Significant at the 10% level; \*\* at the 5% level; \*\*\* at the 1% level. Naive p-values are reported in italics, FDR adjusted  $\alpha$ -values are reported in brackets. The third column in each cell reports  $N$ .

Figure C.6: Parallel Analysis Scree Plots

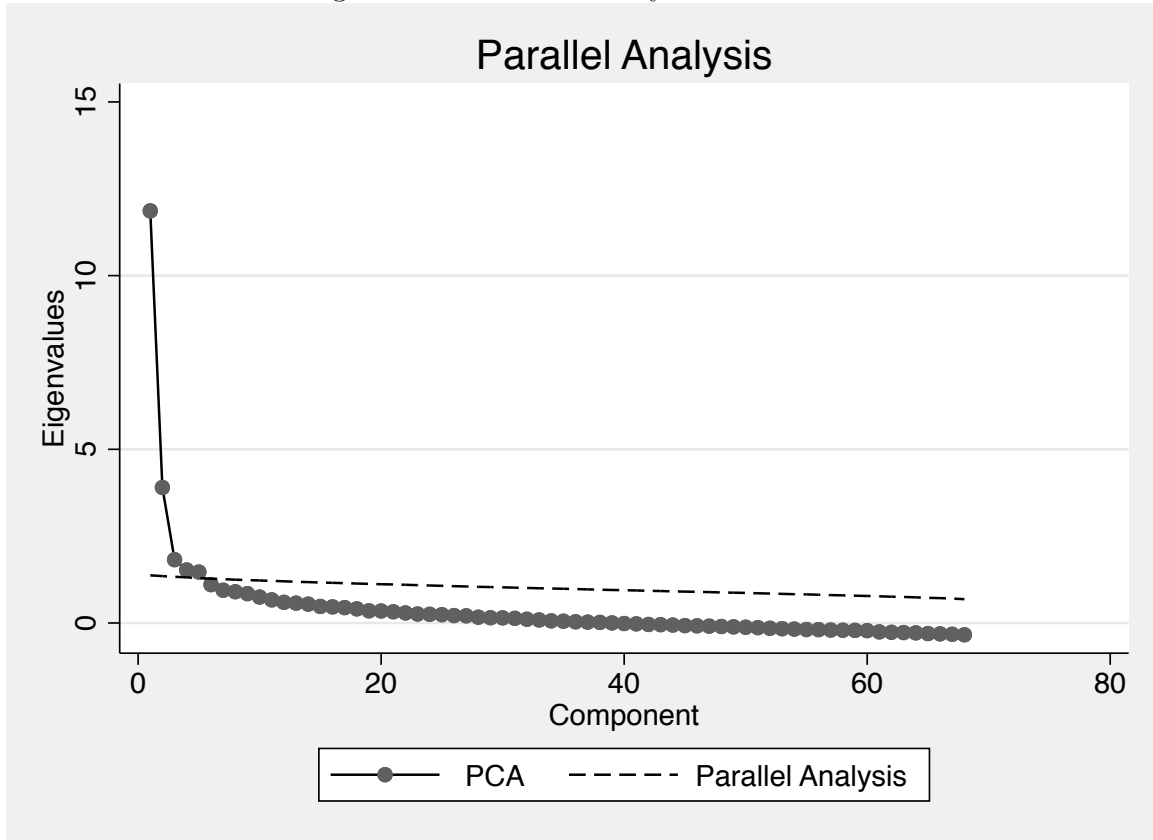

Table C.3 shows the results of confirmatory factor analysis. While this method is less common in economics we use it to compare the multiple factor model against the single factor model. The single factor model assumes all variables measure one factor. In the multiple factor model, time-preference measures, risk-aversion measures and cognitive ability measures are assumed to measure their own latent attributes. We use structural equation modeling to implement both models. Table C.3 compares goodness of fit for both models.

We find that the multiple-factor model vastly outperforms the single factor model on all model performance metrics: lower chi-squared, higher p-value, lower root mean squared error of approximation (RMSEA), lower Akaike and Bayesian Information Criteria, and higher values on both Comparative Fit and Tucker-Lewis indices. This implies that representing time-preferences, risk-preferences, and cognitive ability as a single latent value is vastly outperformed by a model that represents each as their own latent value. Using  $RMSEA \leq 0.05$  as a conventional test for fitness, the test overwhelmingly rejects the single-factor model while the multiple-factor model passes the test with a p-value of 0.99.

Table C.3: Confirmatory Factor Analysis

|                                       | Single Factor Model | Multiple Factor Model |
|---------------------------------------|---------------------|-----------------------|
| Number of Observations                | 316                 | 316                   |
| $\chi^2_M$                            | 178.930             | 57.659                |
| p                                     | 2.69e-15            | .243                  |
| RMSEA                                 | .0856               | .0203                 |
| 90% CI, Lower Bound                   | 0.072               | 0.000                 |
| 90% CI, Upper Bound                   | .0996               | .0428                 |
| Pclose: Probability RMSEA $\leq$ 0.05 | .0000208            | .99                   |
| AIC: Akaike's Information Criterion   | 11,105              | 10,990                |
| BIC: Bayesian Information Criterion   | 11,240              | 11,136                |
| CFI: Comparative Fit Index            | .707                | .984                  |
| TLI: Tucker-Lewis Index               | .642                | .98                   |
